# Diminished circulating retinol and elevated $\alpha$ -TOH/retinol ratio predict an increased risk of cognitive decline in aging Chinese adults, especially in subjects with ApoE2 or ApoE4 genotype

Xiaochen Huang<sup>1</sup>, Huiqiang Zhang<sup>1</sup>, Jie Zhen<sup>1</sup>, Shengqi Dong<sup>1</sup>, Yujie Guo<sup>1</sup>, Nicholas Van Halm-Lutterodt<sup>2,3</sup>, Linhong Yuan<sup>1</sup>

<sup>1</sup>School of Public Health, Capital Medical University, Beijing 100069, P.R. China

<sup>2</sup>Department of Neurosurgery, Beijing Tiantan Hospital, Capital Medical University, Beijing 100050, China

<sup>3</sup>Department of Orthopaedics and Neurosurgery, University of Southern California, Keck Medical Center, Los Angeles, CA 90033, USA

**Correspondence to:** Linhong Yuan; email: [ylhmedu@126.com](mailto:ylhmedu@126.com)

**Keywords:**  $\alpha$ -tocopherol, retinol, cognition, Apolipoprotein E, geriatrics

**Received:** September 26, 2018    **Accepted:** November 29, 2018    **Published:** December 20, 2018

**Copyright:** Huang et al. This is an open-access article distributed under the terms of the Creative Commons Attribution License (CC BY 3.0), which permits unrestricted use, distribution, and reproduction in any medium, provided the original author and source are credited.

## ABSTRACT

**Objective:** The current study evaluated the relationship between circulating fat soluble vitamin status and cognition in aging Chinese population.

**Methods:** A cross-sectional study was carried out in 1754 community residents aged 55-80 years aiming to evaluate the relationship between circulating  $\alpha$ -tocopherol and retinol status and cognition. The effect of ApoE genetic polymorphism on the relationship between vitamins and cognition was also explored.

**Results:** Our results indicated that serum retinol status positively correlated with cognitive performance; while, serum  $\alpha$ -tocopherol ( $\alpha$ -TOH)/retinol ratio negatively correlated with cognitive performance. Mild cognitive impairment (MCI) subject demonstrated higher serum  $\alpha$ -TOH status ( $P < 0.05$ ),  $\alpha$ -TOH/retinol ratio ( $P < 0.01$ ) and lower retinol status ( $P < 0.01$ ) than normal subjects. Subjects with ApoE4 genotype have lower serum retinol level ( $P < 0.05$ ) and higher  $\alpha$ -TOH/retinol ratio ( $P < 0.01$ ) than subjects with ApoE3 genotype. MCI-ApoE4 carriers demonstrated the worst cognitive performance ( $P < 0.05$ ) and exhibited higher serum TC,  $\alpha$ -TOH and  $\alpha$ -TOH/retinol ratio levels ( $P < 0.05$ ), and lower LDL-C, retinol and lipid-adjusted retinol status ( $P < 0.05$ ). MCI-ApoE2 subjects showed higher serum TC, HDL-C content and  $\alpha$ -TOH/retinol ratio ( $P < 0.05$ ); and lower serum retinol and lipid-adjusted retinol status ( $P < 0.05$ ).

**Conclusion:** Lower circulating retinol and higher  $\alpha$ -TOH/retinol ratio potentially predicts an increased risk for the development of cognitive decline in aging Chinese adults. ApoE2 or E4 carriers with higher circulating  $\alpha$ -TOH/retinol ratio infer poor cognitive performance and an increased risk of developing MCI.

## INTRODUCTION

As powerful antioxidants, vitamin A (VA) and vitamin E (VE) play essential roles in maintaining normal brain function [1]. Growing number evidences indicate that greater dietary intake of VA and VE is associated with

substantial reductions in AD risk; while, lesser intake of VA and VE may potentially contribute to neurodegeneration with an increased risk of acquiring AD [2]. Animal-based experimental and population-based epidemiology studies have extensively highlighted the importance of maintaining optimal VA and VE

**Table 1. Demographic characteristic of the participants.**

| Demographic character                    | Total (n = 1754) | Demographic character              | Total (n = 1754) |
|------------------------------------------|------------------|------------------------------------|------------------|
| <b>Age, mean ± SD</b>                    | 65.31 ± 6.30     | Smoking, n (Yes, %)                | 280 (16.0)       |
| <b>Gender, n (%)</b>                     |                  | Reading habit, n (Yes, %)          | 754 (43.0)       |
| <i>Male</i>                              | 568 (32.4)       | AD family history, n (Yes, %)      | 152 (8.7)        |
| <i>Female</i>                            | 1186 (67.6)      | <b>ApoE genotype, n (%)</b>        |                  |
| <b>BMI (kg/m<sup>2</sup>), mean ± SD</b> | 25.34 ± 3.6      | <i>E2</i>                          | 249 (14.2)       |
| <b>Education, n (%)</b>                  |                  | <i>E3</i>                          | 1201 (68.5)      |
| <i>Illiterate</i>                        | 89 (5.1)         | <i>E4</i>                          | 304 (17.3)       |
| <i>Primary school</i>                    | 276 (15.7)       | <b>Serum parameters, mean ± SD</b> |                  |
| <i>Junior high school</i>                | 768 (43.8)       | <i>GLU (mmol/L)</i>                | 5.92 ± 1.86      |
| <i>High school</i>                       | 474 (27.0)       | <i>TC (mmol/L)</i>                 | 5.00 ± 1.03      |
| <i>Junior college</i>                    | 92 (5.2)         | <i>TG (mmol/L)</i>                 | 1.83 ± 1.41      |
| <i>Undergraduate and above</i>           | 50 (2.9)         | <i>LDL-C (mmol/L)</i>              | 2.88 ± 0.86      |
| <b>Life style</b>                        |                  | <i>HDL-C (mmol/L)</i>              | 1.43 ± 0.31      |
| Physical activity, n (%)                 |                  | <i>α-TOH (μmol/L)</i>              | 27.3 ± 8.20      |
| <i>Never</i>                             | 136 (7.8)        | <i>γ-TOH (μmol/L)</i>              | 4.30 ± 1.80      |
| <i>1-3 times/week</i>                    | 210 (12.0)       | <i>α-TOH /TC+TG (μmol/mmol)</i>    | 4.06 ± 0.98      |
| <i>4-5 times/week</i>                    | 198 (11.3)       | <i>γ-TOH /TC+TG (μmol/mmol)</i>    | 0.65 ± 0.24      |
| <i>everyday</i>                          | 1210 (69.0)      | <i>Retinol (μmol/L)</i>            | 1.92 ± 0.63      |
| Alcohol drinking, n (Yes, %)             | 492 (28.1)       | <i>Retinol/TC+TG (μg/mmol)</i>     | 0.31 ± 0.10      |

ApoE: Apolipoprotein E; AD: Alzheimer's disease; SD: standard deviation; BMI: body mass index; GLU: glucose; TC: total cholesterol; TG: triglyceride; LDL-C: low density lipoprotein cholesterol; HDL-C: high density lipoprotein cholesterol; α-TOH: α-tocopherol; γ-TOH: γ-tocopherol.

nutritional status for normal cognitive function outcomes [3]. However, the supplementation of VE and VA provides limited clinical efficacy in the prevention and treatment of dementia [4]. Genetic heterogeneity has been reported as a determinant of *in vivo* vitamins status, which greatly contributes to the individual differences observed in response to vitamin supplementation [5]. Therefore, it has been speculated that an individual's genetic background might determine individual's sensitivity to the dietary supplementation of antioxidant vitamins.

Apolipoprotein E (ApoE) is a major regulator involved in lipid metabolism. ApoE is polymorphic, and the stability and susceptibility to degradation of ApoE has varied based on the ApoE genotype, leading to the unusual trend of increased serum lipids status observed in ApoE4 carriers [6]. The correlation of ApoE

polymorphism and AD has been extensively reported [7]. The differences of serum lipid profile could only partially explain the different cognitive performance across ApoE genotypes [8]. However, there is still much to comprehend of how ApoE polymorphism interacts with other influencing factors (such as *in vivo* nutritional status) to affect cognition and even the development of dementia in aging population.

VA and VE share lipoproteins for their transportation, and their circulating status correlated with concurrent lipids [9]. As a result, the circulating concentrations of VA and VE might also be ApoE polymorphism dependent. Lower tissue α-tocopherol (α-TOH) concentration was found in ApoE4 mice compared with ApoE3 expressing mice [10]. A population-based study indicates that ApoE polymorphism is an independent determinant of plasma VA content [11]. Additionally,

**Table 2. Serum parameters, ApoE genotype and food intake in normal and MCI subjects.**

| Parameters, ApoE genotype and food items | Normal (n = 1171)       | MCI (n = 583)           | P value |
|------------------------------------------|-------------------------|-------------------------|---------|
| <b>Serum parameters</b>                  |                         |                         |         |
| <i>GLU (mmol/L)</i>                      | 5.85 (5.74, 5.96)       | 6.09 (5.94, 6.24)       | 0.014   |
| <i>TC (mmol/L)</i>                       | 4.96 (4.90, 5.02)       | 5.08 (5.00, 5.17)       | 0.014   |
| <i>TG (mmol/L)</i>                       | 1.83 (1.75, 1.92)       | 1.83 (1.71, 1.94)       | 0.934   |
| <i>HDL-C (mmol/L)</i>                    | 1.41 (1.39, 1.42)       | 1.48 (1.45, 1.50)       | 0.000   |
| <i>LDL-C (mmol/L)</i>                    | 2.91 (2.86, 2.96)       | 2.78 (2.71, 2.85)       | 0.003   |
| <i>α-TOH (μmol/L)</i>                    | 26.98 (26.51, 27.47)    | 28.09 (27.44, 28.77)    | 0.007   |
| <i>γ-TOH(μmol/L)</i>                     | 4.30 (4.20, 4.42)       | 4.42 (4.27, 4.58)       | 0.171   |
| <i>α-TOH/TG+TC (μmol/mmol)</i>           | 4.06 (3.99, 4.11)       | 4.16 (4.09, 4.25)       | 0.020   |
| <i>γ-TOH/TG+TC (μmol/mmol)</i>           | 0.65 (0.65, 0.67)       | 0.65 (0.65, 0.67)       | 0.430   |
| <i>Retinol (μmol/L)</i>                  | 1.99 (1.95, 2.02)       | 1.78 (1.71, 1.82)       | 0.000   |
| <i>Retinol/TG+TC (mg/mmol)</i>           | 0.31 (0.31, 0.31)       | 0.28 (0.28, 0.28)       | 0.000   |
| <i>α-TOH /retinol</i>                    | 15.00 (14.61, 15.39)    | 17.50 (16.94, 18.0)     | 0.000   |
| <i>γ-TOH /retinol</i>                    | 2.36 (2.29, 2.44)       | 2.77 (2.66, 2.87)       | 0.000   |
| <b>ApoE genotype, n (%)</b>              |                         |                         | 0.083   |
| <i>E2</i>                                | 150 (12.8)              | 99 (16.9)               |         |
| <i>E3</i>                                | 813 (69.4)              | 388 (66.6)              |         |
| <i>E4</i>                                | 208 (17.8)              | 96 (16.5)               |         |
| <b>Food items , (g/d)</b>                |                         |                         |         |
| <i>Fruit</i>                             | 154.79 (148.52, 161.07) | 154.61 (145.72, 163.51) | 0.975   |
| <i>Vegetable</i>                         | 310.82 (303.05, 318.58) | 287.55 (276.55, 298.56) | 0.001   |
| <i>Legume</i>                            | 29.63 (28.07, 31.19)    | 30.51 (28.30, 32.73)    | 0.523   |
| <i>Cooking oil</i>                       | 29.52 (28.42, 30.62)    | 29.95 (28.40, 31.51)    | 0.656   |
| <i>Fish</i>                              | 19.96 (19.00, 20.91)    | 19.05 (17.70, 20.40)    | 0.283   |
| <i>Whole grain</i>                       | 33.83 (31.77, 35.88)    | 42.78 (39.86, 45.69)    | 0.000   |
| <i>Red meat</i>                          | 29.48 (27.77, 31.18)    | 30.77 (28.36, 33.19)    | 0.391   |
| <i>Poultry</i>                           | 13.92 (13.09, 14.75)    | 13.27 (12.09, 14.45)    | 0.377   |
| <i>Nut</i>                               | 17.16 (15.73, 18.59)    | 17.17 (15.15, 19.19)    | 0.994   |
| <i>Milk</i>                              | 128.55 (122.43, 134.67) | 130.81 (122.13, 139.49) | 0.676   |
| <i>Egg</i>                               | 31.23 (30.15, 32.31)    | 34.27 (32.74, 35.79)    | 0.002   |

The data were represented as mean (95% CI) or percentage. General Linear Model (GLM) was used for the comparison of serum parameters and food intakes. During the comparison of serum parameter, possible confounding factors including gender, age, BMI, smoking habit, physical activity, alcohol drinking, antioxidant supplement, diabetes and hyperlipidemia were adjusted. During comparison of daily food intakes, confounding factors including gender, age, BMI, smoking habit, physical activity and alcohol drinking were adjusted. Chi-square test was used for the comparison of ApoE genotype distribution among groups. MCI: mild cognitive impairment; TC: total cholesterol; TG: triglyceride; LDL-C: low density lipoprotein cholesterol; HDL-C: high density lipoprotein cholesterol; ApoE: Apolipoprotein E; α-TOH: α-tocopherol; γ-TOH: γ-tocopherol; MoCA: Montreal Cognitive Assessment. *P* < 0.05 was considered to be statistically significant.

**Table 3. Partial correlation coefficients between serum  $\alpha$ -TOH and retinol status and cognition (n = 1754).**

| Cognition                 | Retinol | Retinol /TG+TC | $\alpha$ -TOH | $\gamma$ -TOH | $\alpha$ -TOH /TG+TC | $\gamma$ -TOH /TG+TC | $\alpha$ -TOH /retinol | $\gamma$ -TOH /retinol |
|---------------------------|---------|----------------|---------------|---------------|----------------------|----------------------|------------------------|------------------------|
| Visual executive &        | 0.188** | 0.168**        | -0.068**      | -0.061*       | -0.032               | -0.039               | -0.180**               | -0.171**               |
| Naming                    | 0.080** | 0.108**        | -0.039        | -0.096**      | 0.008                | -0.069**             | -0.093**               | -0.137**               |
| Attention                 | 0.073** | 0.084*         | -0.031        | -0.064**      | 0.020                | -0.045               | -0.058*                | -0.092**               |
| Language                  | 0.187** | 0.154**        | -0.047        | -0.015        | -0.050*              | -0.008               | -0.160**               | -0.131**               |
| Abstraction               | 0.159** | 0.140**        | -0.013        | 0.002         | -0.001               | 0.004                | -0.115**               | -0.092**               |
| Memory and delayed recall | 0.161** | 0.137**        | -0.015        | -0.003        | -0.020               | -0.005               | -0.111**               | -0.103**               |
| Orientation               | -0.002  | 0.023          | 0.025         | -0.057*       | 0.064                | -0.043               | 0.038                  | -0.030                 |
| MoCA Score                | 0.222** | 0.206**        | -0.055*       | -0.058*       | -0.021               | -0.039               | -0.179**               | -0.180**               |

Partial correlation analysis was used to explore the relationship between serum  $\alpha$ -TOH,  $\gamma$ -TOH and retinol status with cognition. Factors including age, gender, BMI, smoking, alcohol and physical activity were adjusted during data analysis. MoCA: Montreal Cognitive Assessment;  $\alpha$ -TOH:  $\alpha$ -tocopherol;  $\gamma$ -TOH:  $\gamma$ -tocopherol; TG: triglyceride; TC: total cholesterol. \*:  $P < 0.05$ ; \*\*:  $P < 0.01$ .

the presence of ApoE  $\epsilon$ 4 allele has been reported to play a prominent role in affecting serum VE concentration in cognitively healthy elderly individuals [12]. A study conducted in a non-Westernized population has depicted that the association between serum vitamin status and cognitive impairment could be potentially modulated by ApoE polymorphism [13]. These findings suggested the association of ApoE genetic variations, circulating vitamin status and cognition.

To date, the influence of ApoE genetic polymorphism regarding *in vivo* VA and VE status on cognition has not been fully investigated in aging Chinese population. Therefore, we carried out the present cross-sectional study with the main objective to analyze the association of circulating VA and VE status with cognitive performance. The modifying effect of ApoE genetic polymorphism on the relationship between antioxidant vitamins and cognition was also highlighted.

## RESULTS

### Demographic characteristics of the participants

Finally, total of 1754 individuals were included in the subsequent analysis. The mean age of the participants

was  $65.31 \pm 6.30$  years. The average BMI of the subjects was  $25.34 \pm 3.60$  kg/m<sup>2</sup>. The average serum levels of  $\alpha$ -TOH,  $\gamma$ -TOH and retinol were  $27.3 \pm 8.20$   $\mu$ mol/L,  $4.30 \pm 1.80$   $\mu$ mol/L and  $1.92 \pm 0.63$   $\mu$ mol/L respectively. Serum VA and VE levels were circulating lipids status related, therefore, the VA and VE levels were adjusted by lipid (total cholesterol + triglyceride, TC+TG) in the current study. And the average lipid-adjusted  $\alpha$ -TOH,  $\gamma$ -TOH and retinol levels were  $4.06 \pm 0.98$   $\mu$ mol/mmol,  $0.65 \pm 0.24$   $\mu$ mol/mmol and  $0.31 \pm 0.10$   $\mu$ mol/mmol respectively (Table 1).

### Serum parameters, ApoE genotype and food intake in normal and MCI subjects

According to the cut-off point of mild cognitive impairment (MCI) described in methods, 538 MCI subjects were screened. MCI subjects demonstrated higher serum glucose (GLU) ( $P < 0.05$ ), total cholesterol (TC) ( $P < 0.05$ ) and high-density lipoprotein cholesterol (HDL-C) ( $P < 0.01$ ) and lower low-density lipoprotein cholesterol (LDL-C) ( $P < 0.01$ ) levels than normal subjects. Higher serum  $\alpha$ -TOH ( $P < 0.01$ ) and lipid-adjusted  $\alpha$ -TOH ( $\alpha$ -TOH/TG+TC) ( $P < 0.05$ ), and lower serum retinol ( $P < 0.01$ ) and lipid-adjusted retinol (retinol/TG+TC) ( $P < 0.01$ ) status were observed in

**Table 4. Serum parameters, cognition and food intakes according to lipid-adjusted retinol status (n = 1754).**

| Parameters, cognition and Food intake | Retinol/TG+TC           |                                      |                                    |                                        | P value |
|---------------------------------------|-------------------------|--------------------------------------|------------------------------------|----------------------------------------|---------|
|                                       | Q1 (n = 429)            | Q2 (n = 455)                         | Q3 (n = 440)                       | Q4 (n = 430)                           |         |
| <b>Serum parameters (mmol/L)</b>      |                         |                                      |                                    |                                        |         |
| <i>Glu</i>                            | 6.26 (6.10, 6.42)       | 6.06 (5.91, 6.21)                    | 5.78 (5.63, 5.93) <sup>b</sup>     | 5.60 (5.44, 5.76) <sup>ab</sup>        | 0.000   |
| <i>TC</i>                             | 5.55 (5.46, 5.64)       | 5.18 (5.10, 5.26) <sup>a</sup>       | 4.87 (4.78, 4.95) <sup>ab</sup>    | 4.40 (4.31, 4.49) <sup>abc</sup>       | 0.000   |
| <i>TG</i>                             | 2.53 (2.40, 2.66)       | 1.85 (1.73, 1.98) <sup>a</sup>       | 1.55 (1.43, 1.68) <sup>ab</sup>    | 1.39 (1.26, 1.52) <sup>ab</sup>        | 0.000   |
| <i>HDL-C</i>                          | 1.49 (1.46, 1.51)       | 1.46 (1.43, 1.49)                    | 1.41 (1.38, 1.44) <sup>ab</sup>    | 1.36 (1.33, 1.39) <sup>abc</sup>       | 0.000   |
| <i>LDL-C</i>                          | 3.00 (2.92, 3.08)       | 2.87 (2.79, 2.95) <sup>a</sup>       | 2.90 (2.82, 2.98) <sup>a</sup>     | 2.72 (2.64, 2.80) <sup>abc</sup>       | 0.000   |
| <b>Cognition</b>                      |                         |                                      |                                    |                                        |         |
| <i>Visual-spatial and executive</i>   | 3.43 (3.32, 3.55)       | 3.66 (3.55, 3.77) <sup>a</sup>       | 3.75 (3.64, 3.86) <sup>a</sup>     | 3.93 (3.82, 4.05) <sup>abc</sup>       | 0.000   |
| <i>Naming</i>                         | 2.84 (2.80, 2.88)       | 2.86 (2.82, 2.90)                    | 2.89 (2.85, 2.93)                  | 2.94 (2.90, 2.98) <sup>a</sup>         | 0.009   |
| <i>Attention</i>                      | 5.31 (5.21, 5.41)       | 5.24 (5.15, 5.34)                    | 5.33 (5.24, 5.44)                  | 5.41 (5.31, 5.51)                      | 0.148   |
| <i>Language</i>                       | 1.90 (1.81, 1.98)       | 1.97 (1.89, 2.05)                    | 2.06 (1.98, 2.14) <sup>a</sup>     | 2.21 (2.13, 2.30) <sup>abc</sup>       | 0.000   |
| <i>Abstraction</i>                    | 1.45 (1.39, 1.52)       | 1.49 (1.43, 1.55)                    | 1.54 (1.48, 1.61)                  | 1.62 (1.55, 1.68) <sup>abc</sup>       | 0.007   |
| <i>Memory and delayed recall</i>      | 2.59 (2.44, 2.73)       | 2.63 (2.49, 2.78)                    | 2.73 (2.59, 2.87)                  | 3.18 (3.03, 3.32) <sup>abc</sup>       | 0.000   |
| <i>Orientation</i>                    | 5.82 (5.76, 5.89)       | 5.77 (5.71, 5.84)                    | 5.77 (5.70, 5.83)                  | 5.86 (5.80, 5.93)                      | 0.140   |
| <i>MoCA score</i>                     | 23.36 (22.95, 23.76)    | 23.66 (23.27, 24.04)                 | 24.25 (23.86, 24.65) <sup>ab</sup> | 25.51 (25.11, 25.91) <sup>abc</sup>    | 0.000   |
| <b>Food Items, (g/d)</b>              |                         |                                      |                                    |                                        |         |
| <i>Fruit</i>                          | 162.47 (151.91, 173.04) | 165.87 (155.75, 176.00)              | 153.16 (142.89, 163.44)            | 137.26 (126.68, 147.85) <sup>abc</sup> | 0.010   |
| <i>Vegetable</i>                      | 287.63 (274.68, 300.57) | 287.39 (274.98, 299.80)              | 300.96 (288.37, 313.55)            | 337.14 (324.17, 350.11) <sup>abc</sup> | 0.000   |
| <i>Legume</i>                         | 30.71 (28.09, 33.34)    | 32.19 (29.67, 34.71)                 | 29.43 (26.89, 31.98)               | 27.58 (24.94, 30.21)                   | 0.090   |
| <i>Cooking oil</i>                    | 28.42 (26.57, 30.26)    | 29.05 (27.28, 30.82)                 | 30.08 (28.28, 31.88)               | 31.14 (29.29, 32.99)                   | 0.195   |
| <i>Fish</i>                           | 18.70 (17.09, 20.32)    | 20.47 (18.92, 22.01)                 | 19.94 (18.37, 21.51)               | 19.33 (17.71, 20.95)                   | 0.440   |
| <i>Whole grain</i>                    | 44.08 (40.67, 47.49)    | 41.86 (38.59, 45.12)                 | 35.53 (32.21, 38.85) <sup>ab</sup> | 25.37 (21.96, 28.79) <sup>abc</sup>    | 0.000   |
| <i>Red meat</i>                       | 32.04 (29.14, 34.93)    | 30.70 (27.93, 33.47)                 | 29.57 (26.75, 32.38)               | 27.20 (24.30, 30.09)                   | 0.132   |
| <i>Poultry</i>                        | 13.44 (12.03, 14.85)    | 14.28 (12.93, 15.63)                 | 13.59 (12.22, 14.96)               | 13.52 (12.11, 14.93)                   | 0.820   |
| <i>Nuts</i>                           | 22.64 (20.26, 25.01)    | 18.06 (15.78, 20.34) <sup>a</sup>    | 15.56 (13.25, 17.87) <sup>a</sup>  | 12.42 (10.04, 14.80) <sup>a</sup>      | 0.000   |
| <i>Milk</i>                           | 141.29 (130.97, 151.61) | 124.35 (114.46, 134.23) <sup>a</sup> | 126.89 (116.86, 136.93)            | 124.79 (114.46, 135.13)                | 0.072   |
| <i>Egg</i>                            | 35.50 (33.69, 37.30)    | 33.89 (32.16, 35.61)                 | 31.14 (29.39, 32.90) <sup>ab</sup> | 28.27 (26.47, 30.08) <sup>abc</sup>    | 0.000   |

The data were represented as mean (95% CI) or percentage. General Linear Model (GLM) was used for the comparison of serum parameters, cognitive performance and daily dietary intakes. During the comparison of serum parameter, possible confounding factors including gender, age, BMI, smoking habit, alcohol drinking, physical activity, diabetes and hyperlipidemia were adjusted; During the comparison of cognition, confounding factors including gender, age, BMI, smoking habit, physical activity, alcohol drinking, education level and AD family history were adjusted; During comparison of daily dietary intakes, confounding factors including gender, age, BMI, smoking habit, physical activity and alcohol drinking were adjusted. MoCA: Montreal Cognitive Assessment; Glu: glucose; TC: total cholesterol; TG: triglyceride; LDL-C: low density lipoprotein cholesterol; HDL-C: high density lipoprotein cholesterol; Q: quartile; a: comparing with Q1 group,  $P < 0.05$ ; b: comparing with Q2 group,  $P < 0.05$ ; c: comparing with Q3 group,  $P < 0.05$ .

MCI subjects. We did not detect the difference of ApoE genotype frequency between normal and MCI subjects ( $P > 0.05$ ). MCI subjects also demonstrated higher serum  $\alpha$ -TOH/retinol and  $\gamma$ -TOH/retinol ratio than normal subjects. Significant food intake difference was also observed between normal and MCI subjects, demonstrating by higher daily whole grains ( $P < 0.01$ ), egg ( $P < 0.05$ ) and lower vegetable ( $P < 0.01$ ) intakes in MCI subjects (Table 2).

### Correlation of serum vitamins and cognitive performance

Serum retinol status positively correlated with visual and executive ( $r = 0.188$ ,  $P < 0.01$ ), naming ( $r = 0.08$ ,  $P < 0.01$ ), attention ( $r = 0.073$ ,  $P < 0.01$ ), language ( $r = 0.187$ ,  $P < 0.01$ ), abstraction ( $r = 0.159$ ,  $P < 0.01$ ), memory and delayed recall ( $r = 0.161$ ,  $P < 0.01$ ) abilities, and global cognitive function (MoCA score) ( $r$

**Table 5. Serum parameters, cognition and food intakes according to lipid-adjusted  $\alpha$ -TOH status (n = 1754).**

| Parameters, cognition and Food intake | $\alpha$ -TOH/TG+TC     |                                   |                                      |                                      | P value |
|---------------------------------------|-------------------------|-----------------------------------|--------------------------------------|--------------------------------------|---------|
|                                       | Q1 (n = 431)            | Q2 (n = 450)                      | Q3 (n = 426)                         | Q4 (n = 447)                         |         |
| <b>Serum parameters (mmol/L)</b>      |                         |                                   |                                      |                                      |         |
| GLU                                   | 6.07 (5.91, 6.23)       | 5.93 (5.77, 6.08)                 | 5.87 (5.71, 6.03)                    | 5.85 (5.69, 6.00)                    | 0.207   |
| TC                                    | 5.33 (5.23, 5.42)       | 5.08 (4.99, 5.16) <sup>a</sup>    | 4.97 (4.88, 5.06) <sup>a</sup>       | 4.65 (4.56, 4.74) <sup>abc</sup>     | 0.000   |
| TG                                    | 2.40 (2.27, 2.52)       | 1.87 (1.74, 1.99) <sup>a</sup>    | 1.65 (1.53, 1.78) <sup>ab</sup>      | 1.42 (1.30, 1.55) <sup>abc</sup>     | 0.000   |
| HDL-C                                 | 1.38 (1.35, 1.40)       | 1.43 (1.40, 1.45) <sup>a</sup>    | 1.44 (1.41, 1.47) <sup>a</sup>       | 1.47 (1.44, 1.50) <sup>a</sup>       | 0.000   |
| LDL-C                                 | 3.19 (3.11, 3.26)       | 2.99 (2.91, 3.06) <sup>a</sup>    | 2.82 (2.74, 2.89) <sup>ab</sup>      | 2.52 (2.44, 2.59) <sup>abc</sup>     | 0.000   |
| <b>Cognition</b>                      |                         |                                   |                                      |                                      |         |
| Visual-spatial and executive          | 3.71 (3.59, 3.83)       | 3.79 (3.68, 3.91)                 | 3.66 (3.55, 3.78)                    | 3.61 (3.49, 3.72)                    | 0.128   |
| Naming                                | 2.86 (2.82, 2.90)       | 2.90 (2.86, 2.93)                 | 2.91 (2.87, 2.95)                    | 2.86 (2.82, 2.90)                    | 0.210   |
| Attention                             | 5.22 (5.12, 5.33)       | 5.39 (5.29, 5.48)                 | 5.33 (5.23, 5.43)                    | 5.36 (5.26, 5.46)                    | 0.125   |
| Language                              | 2.03 (1.95, 2.12)       | 2.09 (2.00, 2.17)                 | 2.02 (1.93, 2.10)                    | 2.00 (1.92, 2.09)                    | 0.534   |
| Abstraction                           | 1.52 (1.46, 1.59)       | 1.55 (1.49, 1.61)                 | 1.49 (1.43, 1.56)                    | 1.53 (1.47, 1.59)                    | 0.695   |
| Memory and delayed recall             | 2.66 (2.51, 2.81)       | 2.98 (2.84, 3.13) <sup>a</sup>    | 2.73 (2.58, 2.88) <sup>b</sup>       | 2.74 (2.59, 2.88)                    | 0.011   |
| Orientation                           | 5.72 (5.66, 5.79)       | 5.81 (5.74, 5.87)                 | 5.86 (5.80, 5.93) <sup>a</sup>       | 5.83 (5.77, 5.90) <sup>a</sup>       | 0.020   |
| MoCA score                            | 24.06 (23.66, 24.46)    | 24.66 (24.27, 25.05) <sup>a</sup> | 23.97 (23.57, 24.37) <sup>ab</sup>   | 24.03 (23.64, 24.42) <sup>b</sup>    | 0.049   |
| <b>Food Items, (g/d)</b>              |                         |                                   |                                      |                                      |         |
| Fruit                                 | 143.84 (133.40, 154.28) | 160.82 (150.68, 170.95)           | 159.34 (148.86, 169.82)              | 155.12 (144.94, 165.31)              | 0.098   |
| Vegetable                             | 296.38 (283.46, 309.30) | 306.90 (294.35, 319.44)           | 306.42 (293.45, 319.40)              | 302.60 (290.00, 315.21)              | 0.648   |
| Legume                                | 28.35 (25.75, 30.94)    | 30.16 (27.64, 32.68)              | 31.19 (28.58, 33.79)                 | 30.31 (27.78, 32.85)                 | 0.489   |
| Cooking oil                           | 29.06 (27.23, 30.88)    | 30.94 (29.17, 32.72)              | 28.70 (26.87, 30.54)                 | 29.81(28.03, 31.59)                  | 0.320   |
| Fish                                  | 18.93 (17.34, 20.52)    | 20.64 (19.10, 22.18)              | 20.32 (18.72, 21.91)                 | 18.63 (17.08, 20.18)                 | 0.194   |
| Whole grain                           | 31.12 (27.72, 34.52)    | 35.67 (32.37, 38.97)              | 37.53 (34.12, 40.95) <sup>a</sup>    | 42.61 (39.29, 45.92) <sup>ab</sup>   | 0.000   |
| Red meat                              | 27.84 (25.00, 30.68)    | 29.16 (26.41,31.91)               | 30.84 (27.99, 33.69)                 | 31.70 (28.93, 34.47)                 | 0.228   |
| Poultry                               | 13.16 (11.77, 14.55)    | 14.14 (12.80, 15.49)              | 14.34 (12.95, 15.73)                 | 13.24 (11.88, 14.59)                 | 0.518   |
| Nut                                   | 16.61 (14.24, 18.98)    | 15.67 (13.37, 17.97)              | 19.49 (17.11, 21.86)                 | 17.07 (14.76, 19.38)                 | 0.138   |
| Milk                                  | 125.12 (114.98, 135.26) | 118.63 (108.79, 128.47)           | 135.66 (125.48, 145.84) <sup>b</sup> | 137.90 (128.01, 147.79) <sup>b</sup> | 0.023   |
| Egg                                   | 31.00 (29.20, 32.79)    | 31.04 (29.30, 32.79)              | 33.20 (31.40, 35.00)                 | 33.67 (31.92, 35.42)                 | 0.063   |

The data were represented as mean (95% CI) or percentage. General Linear Model (GLM) was used for the comparison of serum parameters, cognitive performance and daily dietary intakes. During the comparison of serum parameter, possible confounding factors including gender, age, BMI, smoking habit, alcohol drinking, physical activity, diabetes and hyperlipidemia were adjusted; During the comparison of cognition, confounding factors including gender, age, BMI, smoking habit, physical activity, alcohol drinking, education level and AD family history were adjusted; During comparison of daily dietary intakes, confounding factors including gender, age, BMI, smoking habit, physical activity and alcohol drinking were adjusted. MoCA: Montreal Cognitive Assessment;  $\alpha$ -TOH:  $\alpha$ -tocopherol; Glu: glucose; TC: total cholesterol; TG: triglyceride; LDL-C: low density lipoprotein cholesterol; HDL-C: high density lipoprotein cholesterol; Q: quartile; a: comparing with Q1 group,  $P < 0.05$ ; b: comparing with Q2 group,  $P < 0.05$ ; c: comparing with Q3 group,  $P < 0.05$ .

= 0.222,  $P < 0.01$ ). Lipid-adjusted retinol status positively correlated with visual and executive ( $r = 0.168$ ,  $P < 0.01$ ), naming ( $r = 0.108$ ,  $P < 0.01$ ), attention ( $r = 0.084$ ,  $P < 0.05$ ), language ( $r = 0.154$ ,  $P < 0.01$ ), abstraction ( $r = 0.140$ ,  $P < 0.01$ ), memory and delayed recall ( $r = 0.137$ ,  $P < 0.01$ ) abilities and global cognitive function (MoCA score) ( $r = 0.206$ ,  $P < 0.01$ ). Serum  $\alpha$ -TOH and  $\gamma$ -TOH status negatively correlated with visual and executive function ( $r_{\alpha\text{-TOH}} = -0.068$ ,  $P < 0.01$ ;  $r_{\gamma\text{-TOH}} = -0.061$ ,  $P < 0.05$ ) and total MoCA score ( $r_{\alpha\text{-TOH}} = -0.055$ ,  $P < 0.05$ ;  $r_{\gamma\text{-TOH}} = -0.058$ ,  $P < 0.05$ ). Serum  $\alpha$ -TOH/retinol ratio negatively correlated with visual and

executive ( $r = 0.168$ ,  $P < 0.01$ ), naming ( $r = 0.108$ ,  $P < 0.01$ ), attention ( $r = 0.084$ ,  $P < 0.05$ ), language ( $r = 0.154$ ,  $P < 0.01$ ), abstraction ( $r = 0.140$ ,  $P < 0.01$ ), memory and delayed recall ( $r = 0.137$ ,  $P < 0.01$ ) abilities, and global cognitive function (MoCA score) ( $r = 0.206$ ,  $P < 0.01$ ) (Table 3).

#### Serum parameters, cognition and food intake according to lipid-adjusted retinol status

After grouping the subjects according to the quartile (Q1 - Q4) of lipid-adjusted retinol status, the difference

**Table 6. Serum parameters, cognition and food intakes according to  $\alpha$ -TOH/retinol ratio (n = 1754).**

| Parameters, cognition and Food intake | $\alpha$ -TOH/retinol ratio |                                   |                                    |                                        | P value |
|---------------------------------------|-----------------------------|-----------------------------------|------------------------------------|----------------------------------------|---------|
|                                       | Q1 (n = 431)                | Q2 (n = 450)                      | Q3 (n = 426)                       | Q4 (n = 447)                           |         |
| <b>Serum parameters (mmol/L)</b>      |                             |                                   |                                    |                                        |         |
| <i>Glu</i>                            | 5.64 (5.46, 5.82)           | 5.96 (5.79, 6.14)                 | 5.91 (5.73, 6.09) <sup>a</sup>     | 6.21 (6.03, 6.39) <sup>abc</sup>       | 0.000   |
| <i>TC</i>                             | 4.64 (4.55, 4.74)           | 4.96 (4.87, 5.05) <sup>a</sup>    | 5.07 (4.98, 5.16) <sup>ab</sup>    | 5.32 (5.23, 5.41) <sup>abc</sup>       | 0.000   |
| <i>TG</i>                             | 1.48 (1.34, 1.61)           | 1.80 (1.66, 1.93) <sup>a</sup>    | 1.87 (1.74, 2.00) <sup>ab</sup>    | 2.17 (2.04, 2.30) <sup>abc</sup>       | 0.000   |
| <i>HDL-C</i>                          | 1.34 (1.31, 1.37)           | 1.42 (1.39, 1.45)                 | 1.45 (1.42, 1.47) <sup>ab</sup>    | 1.51 (1.48, 1.54) <sup>abc</sup>       | 0.000   |
| <i>LDL-C</i>                          | 2.95 (2.87, 3.03)           | 2.91 (2.83, 2.99) <sup>a</sup>    | 2.83 (2.75, 2.91) <sup>a</sup>     | 2.79 (2.71, 2.87) <sup>ab</sup>        | 0.034   |
| <b>Cognition</b>                      |                             |                                   |                                    |                                        |         |
| <i>Visual-spatial and executive</i>   | 3.88 (3.77, 4.00)           | 3.82 (3.71, 3.93) <sup>a</sup>    | 3.64 (3.52, 3.75) <sup>ab</sup>    | 3.43 (3.32, 3.55) <sup>abc</sup>       | 0.000   |
| <i>Naming</i>                         | 2.94 (2.90, 2.98)           | 2.86 (2.82, 2.90) <sup>a</sup>    | 2.87 (2.83, 2.91) <sup>a</sup>     | 2.86 (2.82, 2.90) <sup>a</sup>         | 0.000   |
| <i>Attention</i>                      | 5.22 (5.12, 5.33)           | 5.39 (5.29, 5.48)                 | 5.33 (5.23, 5.43)                  | 5.36 (5.26, 5.46) <sup>a</sup>         | 0.023   |
| <i>Language</i>                       | 2.21 (2.12, 2.29)           | 2.06 (1.98, 2.14)                 | 2.00 (1.92, 2.08)                  | 1.86 (1.77, 1.94)                      | 0.249   |
| <i>Abstraction</i>                    | 1.61 (1.54, 1.68)           | 1.52 (1.45, 1.58) <sup>a</sup>    | 1.49 (1.43, 1.56) <sup>a</sup>     | 1.47 (1.40, 1.54) <sup>a</sup>         | 0.000   |
| <i>Memory and delayed recall</i>      | 3.19 (3.04, 3.33)           | 2.76 (2.62, 2.90) <sup>a</sup>    | 2.71 (2.57, 2.85) <sup>a</sup>     | 2.46 (2.32, 2.60) <sup>ac</sup>        | 0.021   |
| <i>Orientation</i>                    | 5.82 (5.75, 5.89)           | 5.71 (5.65, 5.78) <sup>a</sup>    | 5.85 (5.78, 5.91) <sup>b</sup>     | 5.84 (5.78, 5.91) <sup>b</sup>         | 0.000   |
| <i>MoCA score</i>                     | 25.44 (25.04, 25.84)        | 24.16 (23.77, 24.55) <sup>a</sup> | 23.93 (23.54, 24.32) <sup>a</sup>  | 23.19 (22.79, 23.58) <sup>abc</sup>    | 0.012   |
| <b>Food Item, (g/d)</b>               |                             |                                   |                                    |                                        |         |
| <i>Fruit</i>                          | 140.77 (130.28, 151.25)     | 152.87 (142.58, 163.16)           | 159.27 (149.08, 169.47)            | 165.67 (155.40, 175.94) <sup>abc</sup> | 0.009   |
| <i>Vegetable</i>                      | 332.54 (319.52, 345.55)     | 297.02 (284.25, 309.79)           | 288.97 (276.32, 301.61)            | 293.56 (280.80, 306.30) <sup>abc</sup> | 0.000   |
| <i>Legume</i>                         | 27.91 (25.29, 30.53)        | 29.53 (26.96, 32.11)              | 31.23 (28.68, 33.78)               | 30.55 (27.98, 33.11)                   | 0.325   |
| <i>Cooking oil</i>                    | 31.41 (29.56, 33.25)        | 28.30 (26.49, 30.12)              | 29.57 (27.78, 31.37)               | 29.24 (27.43, 31.05)                   | 0.122   |
| <i>Fish</i>                           | 19.57 (17.97, 21.18)        | 20.15 (18.57, 21.72)              | 19.66 (18.10, 21.22)               | 19.04 (17.47, 20.62)                   | 0.816   |
| <i>Whole grain</i>                    | 23.77 (20.39, 27.15)        | 33.98 (30.66, 37.29)              | 43.18 (39.90, 46.47) <sup>ab</sup> | 45.96 (42.65, 49.26) <sup>abc</sup>    | 0.000   |
| <i>Red meat</i>                       | 26.42 (23.55, 29.28)        | 28.30 (25.49, 31.11)              | 31.42 (28.63, 34.21)               | 33.18 (30.37, 35.99) <sup>a</sup>      | 0.005   |
| <i>Poultry</i>                        | 13.67 (12.27, 15.07)        | 13.30 (11.92, 14.68)              | 14.48 (13.11, 15.84)               | 13.26 (11.89, 14.64)                   | 0.575   |
| <i>Nuts</i>                           | 12.94 (10.56, 15.32)        | 14.43 (12.09, 16.76) <sup>a</sup> | 19.00 (16.69, 21.31) <sup>a</sup>  | 21.93 (19.60, 24.26) <sup>a</sup>      | 0.000   |
| <i>Milk</i>                           | 120.38 (110.11, 130.64)     | 123.00 (112.94, 144.91)           | 134.94 (124.97, 144.91)            | 139.20 (129.16, 149.25) <sup>a</sup>   | 0.029   |
| <i>Egg</i>                            | 28.05 (26.25, 29.85)        | 30.46 (28.69, 32.22)              | 33.74 (32.00, 35.49) <sup>ab</sup> | 36.63 (34.87, 38.39) <sup>abc</sup>    | 0.000   |

The data were represented as mean (95% CI) or percentage. General Linear Model (GLM) was used for the comparison of serum parameters, cognitive performance and daily dietary intakes. During the comparison of serum parameter, possible confounding factors including gender, age, BMI, smoking habit, alcohol drinking, physical activity, diabetes and hyperlipidemia were adjusted; during the comparison of cognition, confounding factors including gender, age, BMI, smoking habit, physical activity, alcohol drinking, education level and AD family history were adjusted; During comparison of daily dietary intakes, confounding factors including gender, age, BMI, smoking habit, physical activity and alcohol drinking were adjusted. MoCA: Montreal Cognitive Assessment;  $\alpha$ -TOH:  $\alpha$ -tocopherol; Glu: glucose; TC: total cholesterol; TG: triglyceride; LDL-C: low density lipoprotein cholesterol; HDL-C: high density lipoprotein cholesterol; Q: quartile; a: comparing with Q1 group,  $P < 0.05$ ; b: comparing with Q2 group,  $P < 0.05$ ; c: comparing with Q3 group,  $P < 0.05$ .

of serum parameters, cognitive performance and food intakes between groups was compared. The highest serum TG and LDL-C status was observed in subjects with Q4 level of retinol status ( $P < 0.01$ ). The highest serum HDL-C concentration was found in subjects with Q1 level of retinol status ( $P < 0.01$ ). Following the increase of serum retinol status, cognitive performance demonstrated an increasing trend accordingly; and the best cognition was observed in the Q4 group. The dietary intake was different among the groups as well. The highest daily vegetable ( $P < 0.01$ ) and the lowest fruit ( $P < 0.05$ ), whole grains ( $P < 0.01$ ), nuts ( $P < 0.01$ ) and egg ( $P < 0.01$ ) intake were observed in subjects

with Q4 level of serum retinol status (Table 4).

#### **Serum parameters, cognition and food intake according to lipid-adjusted $\alpha$ -TOH status**

Following an increasing trend in lipid-adjusted  $\alpha$ -TOH status (from Q1 to Q4), the GLU and lipids concentration increased accordingly. Subjects in Q4 group showed higher serum GLU, TC, TG, HDL-C and LDL-C status ( $P < 0.01$ ). Better memory and delayed recall ability ( $P < 0.05$ ) and total MoCA score ( $P < 0.05$ ) was found in subjects with Q2 level of  $\alpha$ -TOH status ( $P < 0.05$ ). Subjects in Q1 group demonstrated

**Table 7. Serum parameters, cognition and food intake according to ApoE genotype in the elderly.**

| Parameters and cognition              | ApoE genotype        |                                   |                                   | P value |
|---------------------------------------|----------------------|-----------------------------------|-----------------------------------|---------|
|                                       | E3 (n = 1201)        | E2 (n = 249)                      | E4 (n = 304)                      |         |
| <b>Serum parameters</b>               |                      |                                   |                                   |         |
| GLU (mmol/L)                          | 5.96 (5.85, 6.06)    | 5.93 (5.69, 6.17)                 | 5.86 (5.65, 6.08)                 | 0.744   |
| TC (mmol/L)                           | 4.99 (4.93, 5.05)    | 4.95 (4.82, 5.07)                 | 5.10 (4.99, 5.22)                 | 0.140   |
| TG (mmol/L)                           | 1.73 (1.65, 1.81)    | 2.08 (1.91, 2.26) <sup>a</sup>    | 2.01 (1.85, 2.16) <sup>a</sup>    | 0.000   |
| HDL-C (mmol/L)                        | 1.42 (1.41, 1.44)    | 1.49 (1.45, 1.52) <sup>a</sup>    | 1.42 (1.39, 1.46) <sup>b</sup>    | 0.008   |
| LDL-C (mmol/L)                        | 2.90 (2.85, 2.95)    | 2.65 (2.54, 2.75) <sup>a</sup>    | 2.94 (2.85, 3.04) <sup>b</sup>    | 0.000   |
| $\alpha$ -TOH ( $\mu$ mol/L)          | 27.00 (26.54, 27.47) | 28.23 (27.23, 29.25) <sup>a</sup> | 28.02 (27.12, 28.95) <sup>a</sup> | 0.025   |
| $\gamma$ -TOH ( $\mu$ mol/L)          | 4.27 (4.18, 4.39)    | 4.49 (4.27, 4.73)                 | 4.51 (4.30, 4.70)                 | 0.062   |
| $\alpha$ -TOH/TG+TC ( $\mu$ mol/mmol) | 4.09 (4.04, 4.16)    | 4.11 (4.04, 4.27)                 | 4.02 (3.92, 4.13)                 | 0.270   |
| $\gamma$ -TOH/TG+TC ( $\mu$ mol/mmol) | 0.65 (0.65, 0.67)    | 0.67 (0.62, 0.70)                 | 0.65 (0.62, 0.67)                 | 0.708   |
| Retinol ( $\mu$ mol/L)                | 1.95 (1.92, 1.99)    | 1.92 (1.85, 1.99)                 | 1.85 (1.78, 1.92) <sup>a</sup>    | 0.020   |
| Retinol/TG+TC ( $\mu$ mol/mmol)       | 0.31 (0.31, 0.31)    | 0.28 (0.28, 0.31)                 | 0.28 (0.24, 0.28) <sup>a</sup>    | 0.000   |
| $\alpha$ -TOH/retinol                 | 15.42 (15.03, 15.81) | 16.23 (15.37, 17.08)              | 17.04 (16.27, 17.81) <sup>a</sup> | 0.001   |
| $\gamma$ -TOH/retinol                 | 2.43 (2.36, 2.51)    | 2.54 (2.37, 2.71)                 | 2.72 (2.56, 2.87) <sup>a</sup>    | 0.004   |
| <b>Cognition</b>                      |                      |                                   |                                   |         |
| Visual-spatial and executive          | 3.74 (3.67, 3.81)    | 3.56 (3.41, 3.71)                 | 3.63 (3.49, 3.76)                 | 0.062   |
| Naming                                | 2.90 (2.88, 2.92)    | 2.87 (2.82, 2.92)                 | 2.83 (2.78, 2.88) <sup>a</sup>    | 0.032   |
| Attention                             | 5.35 (5.29, 5.42)    | 5.19 (5.06, 5.32)                 | 5.30 (5.18, 5.42)                 | 0.079   |
| Language                              | 2.05 (2.00, 2.10)    | 2.03 (1.92, 2.14)                 | 1.97 (1.87, 2.07)                 | 0.414   |
| Abstraction                           | 1.53 (1.49, 1.57)    | 1.46 (1.37, 1.55)                 | 1.55 (1.47, 1.63)                 | 0.288   |
| Memory and delayed recall             | 2.81 (2.73, 2.90)    | 2.66 (2.47, 2.86)                 | 2.74 (2.56, 2.91)                 | 0.337   |
| Orientation                           | 5.84 (5.80, 5.87)    | 5.75 (5.67, 5.84)                 | 5.73 (5.65, 5.81) <sup>a</sup>    | 0.027   |
| MoCA score                            | 24.37 (24.13, 24.61) | 23.65 (23.11, 24.18) <sup>a</sup> | 23.87 (23.39, 24.35)              | 0.020   |

The data were represented as mean (95% CI) or percentage. General Linear Model (GLM) was used for the comparison of serum parameters and cognitive performance. During the comparison of serum parameter, possible confounding factors including gender, age, BMI, smoking habit, alcohol drinking, usage of antioxidant supplement, physical activity, diabetes and hyperlipidemia were adjusted; During the comparison of cognition, confounding factors including gender, age, BMI, smoking habit, physical activity, alcohol drinking, education level and AD family history were adjusted. MCI, mild cognitive impairment; TC: total cholesterol; TG: triglyceride; LDL-C: low density lipoprotein cholesterol; HDL-C: high density lipoprotein cholesterol; ApoE: Apolipoprotein E;  $\alpha$ -TOH:  $\alpha$ -tocopherol;  $\gamma$ -TOH:  $\gamma$ -tocopherol; MoCA: Montreal Cognitive Assessment.  $P < 0.05$  was considered to be statistically significant. a: Comparing with ApoE3 subjects,  $P < 0.05$ ; b: comparing with ApoE2 subjects,  $P < 0.05$ .

lower orientation ability ( $P < 0.05$ ) compared to participants in Q3 and Q4 groups. For dietary intakes, subjects with Q4 level of serum  $\alpha$ -TOH status have higher daily whole grains ( $P < 0.01$ ) and milk intake ( $P < 0.05$ ) (Table 5).

#### Serum parameters, cognition and food intake according to $\alpha$ -TOH/retinol ratio

Following the increase of  $\alpha$ -TOH/retinol ratio, serum GLU, TC, TG and HDL-C status increased accordingly, while, the LDL-C status exhibited a decreased trend (Table 6). The subjects in Q4 group had the highest GLU, TC, TG and HDL-C status ( $P < 0.01$ ) and the lowest LDL-C status ( $P < 0.05$ ). Cognitive performance

decreased according to the increase of  $\alpha$ -TOH/retinol ratio. Subjects with Q1 level of  $\alpha$ -TOH/retinol ratio had the best cognitive performance in visual-spatial and executive, naming, abstraction ( $P < 0.01$ ), memory and delayed recall domains ( $P < 0.05$ ), and total MoCA score ( $P < 0.05$ ). The best attention and orientation performance were observed in subjects with Q2 or Q3 level of  $\alpha$ -TOH/retinol ratio. Following the increase of  $\alpha$ -TOH/retinol ratio, daily intake of fruits, whole grains, red meat, nuts, milk and egg increased correspondingly. The highest daily intake of these food items was observed in subjects with Q4 level of  $\alpha$ -TOH/retinol ratio. Daily vegetable intake exhibited a decreased trend following the increase of  $\alpha$ -TOH/retinol ratio, demonstrating by lower daily vegetable intake in Q3 and Q4 groups.

**Table 8. Comparison of serum parameters, cognition and food intakes in normal and MCI subjects according to ApoE genotype.**

| Parameters and genotype             | Normal (n = 1171)       |                                   |                                   | MCI (n = 583)                        |                                      |                                        | P value |
|-------------------------------------|-------------------------|-----------------------------------|-----------------------------------|--------------------------------------|--------------------------------------|----------------------------------------|---------|
|                                     | ApoE3 (n = 812)         | ApoE2 (n = 151)                   | ApoE4 (n = 208)                   | ApoE3 (n = 389)                      | ApoE2 (n = 98)                       | ApoE4 (n = 96)                         |         |
| <b>Serum parameters</b>             |                         |                                   |                                   |                                      |                                      |                                        |         |
| <i>GLU (mmol/L)</i>                 | 5.89 (5.75, 6.02)       | 5.89 (5.58, 6.19)                 | 5.72 (5.46, 5.98)                 | 6.08 (5.89, 6.28)                    | 6.02 (5.64, 6.40)                    | 6.22 (5.82, 6.59)                      | 0.167   |
| <i>TC (mmol/L)</i>                  | 4.96 (4.89, 5.03)       | 4.83 (4.67, 5.00)                 | 5.07 (4.93, 5.21) <sup>b</sup>    | 5.07 (4.93, 5.21) <sup>b</sup>       | 5.09 (4.89, 5.30) <sup>b</sup>       | 5.18 (4.97, 5.39) <sup>b</sup>         | 0.044   |
| <i>TG (mmol/L)</i>                  | 1.73 (1.64, 1.83)       | 2.20 (1.97, 2.43) <sup>a</sup>    | 2.04 (1.84, 2.23) <sup>a</sup>    | 1.76 (1.61, 1.91) <sup>bc</sup>      | 1.88 (1.59, 2.16)                    | 1.90 (1.61, 2.19)                      | 0.002   |
| <i>HDL-C (mmol/L)</i>               | 1.40 (1.38, 1.42)       | 1.44 (1.40, 1.49)                 | 1.40 (1.36, 1.44)                 | 1.47 (1.44, 1.50) <sup>ac</sup>      | 1.55 (1.49, 1.61) <sup>abcd</sup>    | 1.45 (1.39, 1.51) <sup>c</sup>         | 0.000   |
| <i>LDL-C (mmol/L)</i>               | 2.96 (2.90, 3.02)       | 2.62 (2.48, 2.76) <sup>a</sup>    | 3.00 (2.88, 3.12) <sup>b</sup>    | 2.82 (2.73, 2.91) <sup>ac</sup>      | 2.66 (2.49, 2.83) <sup>ac</sup>      | 2.84 (2.66, 3.01) <sup>c</sup>         | 0.018   |
| <i>α-TOH (μmol/L)</i>               | 26.56 (11.20, 11.68)    | 28.16 (26.86, 29.46) <sup>a</sup> | 27.83 (26.72, 28.92)              | 27.81 (27.00, 28.63) <sup>a</sup>    | 28.56 (26.93, 30.16) <sup>a</sup>    | 28.60 (26.98, 30.23) <sup>a</sup>      | 0.030   |
| <i>γ-TOH (μmol/L)</i>               | 4.22 (4.10, 4.34)       | 4.54 (4.25, 4.82)                 | 4.44 (4.20, 4.68)                 | 4.37 (4.20, 4.56)                    | 4.44 (4.08, 4.80)                    | 4.66 (4.30, 5.04)                      | 0.103   |
| <i>α-TOH/TG+TC(μmol/mmol)</i>       | 4.06 (3.99, 4.11)       | 4.11 (3.97, 4.27)                 | 3.99 (3.88, 4.13)                 | 4.16 (4.09, 4.27)                    | 4.20 (4.02, 4.39)                    | 4.90 (3.91, 4.27)                      | 0.750   |
| <i>γ-TOH/TG+TC(μmol/mmol)</i>       | 0.65 (0.62, 0.70)       | 0.65 (0.62, 0.70)                 | 0.65 (0.60, 0.67)                 | 0.65 (0.63, 0.72)                    | 0.67 (0.63, 0.72)                    | 0.67 (0.63, 0.72)                      | 0.847   |
| <i>Retinol (μmol/L)</i>             | 2.02 (1.99, 2.06)       | 1.99 (1.89, 2.09)                 | 1.95 (1.85, 2.02)                 | 1.82 (1.75, 1.85) <sup>ac</sup>      | 1.82 (1.71, 1.92) <sup>ac</sup>      | 1.61 (1.50, 1.75) <sup>abcde</sup>     | 0.000   |
| <i>Retinol/TG+TC(μmol/mmol)</i>     | 0.31 (0.31, 0.31)       | 0.31 (0.28, 0.31)                 | 0.28 (0.28, 0.31) <sup>a</sup>    | 0.28 (0.28, 0.28) <sup>a</sup>       | 0.28 (0.24, 0.28) <sup>a</sup>       | 0.24 (0.21, 0.24) <sup>abcde</sup>     | 0.000   |
| <i>α-TOH/retinol</i>                | 14.72 (14.24, 15.19)    | 15.81(14.71, 16.91)               | 15.97 (15.03, 16.91) <sup>a</sup> | 17.06 (16.37, 17.75) <sup>ac</sup>   | 16.83 (15.47, 18.19) <sup>a</sup>    | 19.40 (18.03, 20.77) <sup>abcde</sup>  | 0.000   |
| <i>γ-TOH/retinol</i>                | 2.32 (2.23, 2.41)       | 2.49 (2.28, 2.71)                 | 2.50 (2.32, 2.68)                 | 2.69 (2.55, 2.82) <sup>a</sup>       | 2.63 (2.37, 2.90) <sup>a</sup>       | 3.17 (2.84, 3.44) <sup>abcde</sup>     | 0.000   |
| <b>Cognition</b>                    |                         |                                   |                                   |                                      |                                      |                                        |         |
| <i>Visual-spatial and executive</i> | 4.13 (4.06, 4.20)       | 3.99 (3.82, 4.15)                 | 4.08 (3.94, 4.22)                 | 2.88 (2.78, 2.99) <sup>ac</sup>      | 2.89 (2.68, 3.10) <sup>a</sup>       | 2.65 (2.44, 2.86) <sup>abc</sup>       | 0.000   |
| <i>Naming</i>                       | 2.94 (2.91, 2.97)       | 2.96 (2.89, 3.02)                 | 2.96 (2.90, 3.01)                 | 2.80 (2.76, 2.84) <sup>ac</sup>      | 2.74 (2.66, 2.82) <sup>a</sup>       | 2.55 (2.47, 2.63) <sup>abcde</sup>     | 0.000   |
| <i>Attention</i>                    | 5.61 (5.54, 5.68)       | 5.50 (5.34, 5.66)                 | 5.64 (5.50, 5.77)                 | 4.81 (4.71, 4.90) <sup>ac</sup>      | 4.73 (4.53, 4.92) <sup>a</sup>       | 4.57 (4.37, 4.77) <sup>abc</sup>       | 0.000   |
| <i>Language</i>                     | 2.35 (2.29, 2.40)       | 2.40 (2.27, 2.51)                 | 2.28 (2.17, 2.38)                 | 1.40 (1.32, 1.47) <sup>ac</sup>      | 1.46 (1.31, 1.62) <sup>a</sup>       | 1.31 (1.16, 1.47) <sup>abc</sup>       | 0.000   |
| <i>Abstraction</i>                  | 1.73 (1.69, 1.77)       | 1.82 (1.72, 1.92)                 | 1.73 (1.65, 1.81)                 | 1.10 (1.04, 1.16) <sup>ac</sup>      | 0.89 (0.77, 1.02) <sup>ad</sup>      | 1.17 (1.04, 1.29) <sup>abce</sup>      | 0.000   |
| <i>Memory and delayed recall</i>    | 3.31 (3.22, 3.40)       | 3.33 (3.12, 3.54)                 | 3.27 (3.09, 3.44)                 | 1.72 (1.59, 1.86) <sup>ac</sup>      | 1.68 (1.41, 1.94) <sup>a</sup>       | 1.57 (1.30, 1.83) <sup>abc</sup>       | 0.000   |
| <i>Orientation</i>                  | 5.94 (5.89, 5.98)       | 5.96 (5.85, 6.06)                 | 5.90 (5.81, 5.99)                 | 5.61 (5.45, 5.68) <sup>ac</sup>      | 5.44 (5.31, 5.57) <sup>ad</sup>      | 5.37 (5.24, 5.50) <sup>abc</sup>       | 0.000   |
| <i>MoCA score</i>                   | 26.19 (25.98, 26.40)    | 26.11 (25.62, 26.61)              | 26.03 (25.61, 26.45)              | 20.42 (20.11, 20.73) <sup>ac</sup>   | 19.87 (19.25, 20.49) <sup>a</sup>    | 19.20 (18.58, 19.82) <sup>abc</sup>    | 0.000   |
| <b>Food item, (g/d)</b>             |                         |                                   |                                   |                                      |                                      |                                        |         |
| <i>Fruit</i>                        | 156.79 (149.11, 164.47) | 156.27 (138.55, 173.99)           | 158.62 (143.31, 173.93)           | 151.07 (139.71, 162.43)              | 156.90 (134.59, 179.21)              | 157.97 (135.56, 180.39)                | 0.970   |
| <i>Vegetable</i>                    | 312.61 (303.16, 322.06) | 311.88 (290.08, 333.67)           | 308.92 (290.09, 327.75)           | 293.78 (279.81, 307.76) <sup>a</sup> | 281.14 (253.71, 308.58) <sup>a</sup> | 272.52 (244.95, 300.09) <sup>abc</sup> | 0.018   |

|                    |                         |                        |                                   |                                    |                                   |                                   |       |
|--------------------|-------------------------|------------------------|-----------------------------------|------------------------------------|-----------------------------------|-----------------------------------|-------|
| <i>Legume</i>      | 29.57 (27.66, 31.47)    | 32.37 (27.98, 36.76)   | 28.46 (24.67, 32.25)              | 30.45 (27.63, 33.26)               | 28.60 (23.07, 34.13)              | 31.92 (26.37, 37.47)              | 0.737 |
| <i>Cooking oil</i> | 29.57 (28.24, 30.93)    | 29.88 (26.78, 32.98)   | 29.05 (26.37, 31.73)              | 30.04 (28.02, 31.99)               | 30.06 (26.15, 33.96)              | 28.82 (24.89, 32.74)              | 0.990 |
| <i>Fish</i>        | 21.00 (19.83, 22.17)    | 18.44 (15.75, 21.13)   | 17.50 (15.18, 19.83) <sup>a</sup> | 19.45 (17.73, 21.18)               | 18.29 (14.91, 21.68)              | 16.10 (12.70, 19.50) <sup>a</sup> | 0.016 |
| <i>Whole grain</i> | 33.38 (30.89, 35.88)    | 35.76 (30.01,41.52)    | 34.90 (29.93, 39.87)              | 44.63 (40.94, 48.32) <sup>ac</sup> | 37.48 (30.23, 44.72)              | 39.07 (31.79, 46.34)              | 0.000 |
| <i>Red meat</i>    | 29.96 (27.87, 32.05)    | 25.63 (20.80,30.46)    | 30.80 (26.63, 34.98)              | 31.65 (28.55, 34.74)               | 25.25 (19.16, 31.33)              | 33.57 (27.46, 39.68)              | 0.156 |
| <i>Poultry</i>     | 14.60 (13.60, 15.61)    | 11.65 (9.33,13.97)     | 13.10 (11.09, 15.10)              | 13.65 (12.17, 15.14)               | 11.61 (8.68, 14.53)               | 11.61 (8.67, 14.55)               | 0.067 |
| <i>Nut</i>         | 16.55 (14.80, 18.30)    | 20.36 (16.33,24.39)    | 17.04 (13.56, 20.52)              | 17.13 (14.54, 19.71)               | 13.61 (8.54, 18.69)               | 19.85 (14.75, 24.95)              | 0.324 |
| <i>Milk</i>        | 127.33 (119.89, 134.77) | 129.79 (112.63,146.96) | 131.29 (116.46, 146.12)           | 131.96 (120.95,142.96)             | 125.51 (103.90,147.13)            | 139.76 (118.05,161.48)            | 0.906 |
| <i>Egg</i>         | 30.76 (29.45, 32.07)    | 31.02 (28.00,34.03)    | 33.49 (30.88, 36.09)              | 34.66 (32.72, 36.59) <sup>a</sup>  | 36.60 (32.81, 40.40) <sup>a</sup> | 30.68 (26.86, 34.49)              | 0.003 |

The data were represented as mean (95% CI) or percentage. General Linear Model (GLM) was used for the comparison of serum parameters, cognitive performance and daily dietary intakes. During the comparison of serum parameter, possible confounding factors including gender, age, BMI, smoking habit, alcohol drinking, usage of antioxidant supplement, physical activity, diabetes and hyperlipidemia were adjusted; During the comparison of cognition, confounding factors including gender, age, BMI, smoking habit, physical activity, alcohol drinking, education level and AD family history were adjusted; During comparison of daily dietary intakes, confounding factors including gender, age, BMI, smoking habit, physical activity and alcohol drinking were adjusted. MCI: mild cognitive impairment; TC: total cholesterol; TG: triglyceride; LDL-C: low density lipoprotein cholesterol; HDL-C: high density lipoprotein cholesterol;  $\alpha$ -TOH:  $\alpha$ -tocopherol;  $\gamma$ -TOH:  $\gamma$ -tocopherol; ApoE: Apolipoprotein E; MoCA: Montreal Cognitive Assessment.  $P < 0.05$  was considered to be statistically significant. a: Comparing with normal-ApoE3 subjects  $P < 0.05$ ; b: comparing with normal-ApoE2 subjects,  $P < 0.05$ ; c: comparing with normal-ApoE4 subjects,  $P < 0.05$ ; d: comparing with MCI-ApoE3 subjects,  $P < 0.05$ ; e: comparing with MCI-ApoE2 subjects,  $P < 0.05$ .

**Table 9. Logistic analysis of ApoE, lipid-adjusted serum  $\alpha$ -TOH, retinol status and  $\alpha$ -TOH/retinol ratio and the risk of MCI.**

| Predictors                                                           | B      | SE    | Wald   | Adjusted OR | 95/% CI      | P value |
|----------------------------------------------------------------------|--------|-------|--------|-------------|--------------|---------|
| Independent effect of lipid-adjusted $\alpha$ -TOH                   |        |       |        |             |              |         |
| $\alpha$ -TOH/TG+TC Q1 (reference)                                   | -      | -     | -      | 1           | -            | -       |
| $\alpha$ -TOH/TG+TC Q2                                               | -0.083 | 0.150 | 0.305  | 0.920       | 0.686, 1.236 | 0.581   |
| $\alpha$ -TOH/TG+TC Q3                                               | 0.185  | 0.150 | 1.517  | 1.203       | 0.897, 1.613 | 0.218   |
| $\alpha$ -TOH/TG+TC Q4                                               | 0.323  | 0.147 | 4.841  | 1.382       | 1.036, 1.843 | 0.028   |
| Independent effect of lipid-adjusted retinol                         |        |       |        |             |              |         |
| Retinol/TG+TC Q1 (reference)                                         | -      | -     | -      | 1           | -            | -       |
| Retinol/TG+TC Q2                                                     | -0.284 | 0.144 | 3.903  | 0.753       | 0.568, 0.998 | 0.048   |
| Retinol/TG+TC Q3                                                     | -0.529 | 0.149 | 12.517 | 0.589       | 0.440, 0.790 | 0.000   |
| Retinol/TG+TC Q4                                                     | -1.193 | 0.165 | 56.151 | 0.303       | 0.220, 0.419 | 0.000   |
| Independent effect of $\alpha$ -TOH/retinol ratio                    |        |       |        |             |              |         |
| $\alpha$ -TOH/retinol Q1 (reference)                                 | -      | -     | -      | 1           | -            | -       |
| $\alpha$ -TOH/retinol Q2                                             | 0.606  | 0.162 | 13.952 | 1.833       | 1.334, 2.519 | 0.000   |
| $\alpha$ -TOH/retinol Q3                                             | 0.878  | 0.163 | 29.017 | 2.405       | 1.748, 3.310 | 0.000   |
| $\alpha$ -TOH/retinol Q4                                             | 1.287  | 0.164 | 61.865 | 3.621       | 2.628, 4.990 | 0.000   |
| Synergistic effect of ApoE genotype and lipid-adjusted retinol       |        |       |        |             |              |         |
| ApoE3 $\times$ retinol/TG+TC Q1 (reference)                          | -      | -     | -      | 1           | -            | -       |
| ApoE2 $\times$ retinol/TG+TC Q2                                      | 0.005  | 0.298 | 0.000  | 1.005       | 0.560, 1.801 | 0.988   |
| ApoE2 $\times$ retinol/TG+TC Q3                                      | 0.488  | 0.259 | 3.564  | 1.629       | 0.982, 2.705 | 0.059   |
| ApoE2 $\times$ retinol/TG+TC Q4                                      | -0.400 | 0.314 | 1.623  | 0.670       | 0.362, 1.240 | 0.203   |
| ApoE4 $\times$ retinol/TG+TC Q2                                      | 0.157  | 0.234 | 0.446  | 1.170       | 0.739, 1.852 | 0.504   |
| ApoE4 $\times$ retinol/TG+TC Q3                                      | -0.551 | 0.305 | 3.263  | 0.576       | 0.317, 1.048 | 0.071   |
| ApoE4 $\times$ retinol/TG+TC Q4                                      | -1.495 | 0.441 | 11.484 | 0.224       | 0.094, 0.532 | 0.001   |
| Synergistic effect of ApoE genotype and lipid-adjusted $\alpha$ -TOH |        |       |        |             |              |         |
| ApoE3 $\times$ $\alpha$ -TOH/TG+TC Q1 (reference)                    | -      | -     | -      | 1           | -            | -       |
| ApoE2 $\times$ $\alpha$ -TOH/TG+TC Q2                                | 0.242  | 0.264 | 0.835  | 1.273       | 0.758, 2.139 | 0.361   |
| ApoE2 $\times$ $\alpha$ -TOH/TG+TC Q3                                | -0.041 | 0.302 | 0.019  | 0.960       | 0.531, 1.734 | 0.891   |
| ApoE2 $\times$ $\alpha$ -TOH/TG+TC Q4                                | 0.645  | 0.251 | 6.571  | 1.905       | 1.164, 3.119 | 0.010   |
| ApoE4 $\times$ $\alpha$ -TOH/TG+TC Q2                                | -0.615 | 0.275 | 4.997  | 0.540       | 0.315, 0.927 | 0.025   |
| ApoE4 $\times$ $\alpha$ -TOH/TG+TC Q3                                | 0.022  | 0.266 | 0.007  | 1.022       | 0.607, 1.721 | 0.007   |
| ApoE4 $\times$ $\alpha$ -TOH/TG+TC Q4                                | 0.191  | 0.261 | 0.531  | 1.210       | 0.725, 2.020 | 0.466   |
| Synergistic effect of ApoE genotype and $\alpha$ -TOH/retinol        |        |       |        |             |              |         |
| ApoE3 $\times$ $\alpha$ -TOH/retinol Q1 (reference)                  | -      | -     | -      | 1           | -            | -       |
| ApoE2 $\times$ $\alpha$ -TOH/retinol Q2                              | 0.803  | 0.259 | 9.587  | 2.233       | 1.343, 3.714 | 0.002   |
| ApoE2 $\times$ $\alpha$ -TOH/retinol Q3                              | 0.534  | 0.300 | 3.174  | 1.706       | 0.948, 3.071 | 0.075   |
| ApoE2 $\times$ $\alpha$ -TOH/retinol Q4                              | 0.578  | 0.249 | 5.389  | 1.782       | 1.094, 2.902 | 0.020   |
| ApoE4 $\times$ $\alpha$ -TOH/retinol Q2                              | -0.106 | 0.261 | 0.164  | 0.685       | 0.540, 1.499 | 0.900   |
| ApoE4 $\times$ $\alpha$ -TOH/retinol Q3                              | -0.203 | 0.281 | 0.523  | 0.469       | 0.471, 1.415 | 0.816   |
| ApoE4 $\times$ $\alpha$ -TOH/retinol Q4                              | 0.694  | 0.222 | 9.794  | 2.002       | 1.296, 3.093 | 0.002   |

Logistic regression models were created to evaluate the independent and synergistic effects of serum  $\alpha$ -TOH, retinol,  $\alpha$ -TOH/retinol and ApoE genotype on the risk of MCI. Confounding factors such as age, sex, BMI, education, smoking, alcohol drinking, physical activity levels, diabetes and hyperlipidemia were adjusted during analysis. MCI: mild cognitive impairment;  $\alpha$ -TOH:  $\alpha$ -tocopherol; ApoE: Apolipoprotein E; SE: standard error; OR: odds ratio; CI: confidence interval; Q: quartile.

### Serum parameters, cognition and food intake according to ApoE genotype

Compared to ApoE3 subjects, ApoE2 and E4 carriers demonstrated higher serum TG ( $P < 0.01$ ) and  $\alpha$ -TOH concentration ( $P < 0.05$ ). ApoE2 carriers showed to have

the highest serum HDL-C ( $P < 0.01$ ) and the lowest LDL-C levels ( $P < 0.01$ ). ApoE4 carriers demonstrated the lowest serum retinol ( $P < 0.05$ ) and lipid-adjusted retinol status ( $P < 0.01$ ), and the highest  $\alpha$ -TOH/retinol ratio ( $P < 0.01$ ) as compared to ApoE3 and E2 subjects. In regard to cognition, ApoE4 carriers have lower naming ( $P < 0.05$ )

and orientation abilities ( $P < 0.05$ ) and total MoCA score ( $P < 0.05$ ) than ApoE3 subjects (Table 7).

### **Serum parameters, food intake of normal and MCI subjects according to ApoE genotype**

Among normal subjects, the ApoE4 subjects have the highest serum TC and LDL-C levels. The ApoE2 subjects have the lowest serum LDL-C level. ApoE4 subjects exhibited the highest serum  $\alpha$ -TOH level and VE/VA ratio ( $\alpha$ -TOH/retinol and  $\gamma$ -TOH/retinol), and the lowest lipid-adjusted retinol level. No difference of cognitive performance was found among normal subjects with different ApoE genotypes.

Among MCI subjects, ApoE4 subjects have the highest serum TC, TG, LDL-C,  $\alpha$ -TOH levels and VE/VA ratio ( $\alpha$ -TOH/retinol and  $\gamma$ -TOH/retinol). The lowest serum HDL-C, retinol and lipid-adjusted retinol levels were also found in ApoE4 subjects. ApoE4 subjects also demonstrated the lowest visual-spatial and executive, naming, attention, language, memory and delayed recall, orientation abilities and total MoCA score. The lowest daily vegetable and fish intakes were also observed in ApoE4 subjects (Table 8).

### **Logistic analysis of predictive factors associated with increased risk of MCI**

Compared to the subjects with Q1 level of serum  $\alpha$ -TOH/retinol ratio, the subjects with Q2, Q3 and Q4 level of serum  $\alpha$ -TOH/retinol ratio demonstrated increased risk of MCI ( $OR_{Q2 \text{ to } Q1} = 1.56, P = 0.012$ ;  $OR_{Q3 \text{ to } Q1} = 1.87, P = 0.001$ ;  $OR_{Q4 \text{ to } Q1} = 2.65, P < 0.001$ ). The combined effect of ApoE genotype and serum  $\alpha$ -TOH/retinol ratio in affecting the risk of MCI was also observed. ApoE2 carriers with higher serum  $\alpha$ -TOH/retinol ratio demonstrated an increased risk of MCI; and for the subjects in Q2 and Q4 groups, the difference was statistically significant ( $OR_{Q2} = 2.17, P = 0.002$ ;  $OR_{Q4} = 1.65, P = 0.042$ ). ApoE4 carriers with Q4 level of  $\alpha$ -TOH/retinol ratio also demonstrated an increased risk of MCI compared with ApoE3 subjects with Q1 level of  $\alpha$ -TOH/retinol ratio ( $OR = 1.89, P = 0.004$ ) (Table 9).

## **DISCUSSION**

The relationship between circulating VA status with cognition and dementia remains inconclusive [14,15]. These discrepancies observed between studies may be attributed to the differences in studied populations (community-based population vs hospital-based population). In the present study, we found out that a significant positive correlation between circulating retinol status with cognitive performance. Significantly,

lower serum retinol content was observed in MCI subjects. Even after adjusting retinol status with lipids, statistical significance was still indicated. The protective effect of increase in circulating retinol status on cognitive function was also elicited by logistical analysis. These outcomes indicate the correlation between circulating retinol status and cognitive function in the elderly. Our data also indicates that subjects with dietary pattern low in vegetables and high in fruits, whole grains, nuts and egg exhibit lower serum retinol status, as well as poor cognitive performance outcomes. Lower daily vegetable intake was also found particularly in MCI subjects. Given that vegetables are rich in VA and other bioactive substances [16], our results highlight the potential role of dietary VA intake in affecting *in vivo* VA nutritional status and consequently, cognitive outcomes.

Progressive neurologic disorders have been found in the patients with VE deficiency [17,18]. Consistent with these findings, our data demonstrate that lower serum  $\alpha$ -TOH status correlate with poor cognitive performance. Of note, the best cognitive performance was found in subjects with Q2 or Q3 level of lipid-adjusted  $\alpha$ -TOH status instead of in subjects with Q4 level of serum lipid-adjusted  $\alpha$ -TOH status. This outcome indicates that higher serum VE status might deteriorate cognition in the elderly, which is further confirmed by a higher serum  $\alpha$ -TOH and lipid-adjusted  $\alpha$ -TOH status observed in MCI subjects. The relationships between lipids and VE have been comprehensively reported [19]. These results fall in line with the significantly positive correlation between serum  $\alpha$ -TOH status and lipid parameters observed in our study (Supplementary material Table S1). The simultaneous increase in circulating TC, HDL-C and  $\alpha$ -TOH status found in MCI subjects further hints the potential role of lipids in the relationship between VE and cognitive function, and may partially explain the inconsistent conclusions derived from different population-based VE supplementation trials [20, 21].

In the current study, higher serum  $\alpha$ -TOH/retinol ratio was observed in MCI subjects. This higher circulating  $\alpha$ -TOH/retinol ratio might attribute to a lipid-rich and vegetable-less diet demonstrating by higher daily fruits, whole grains, red meat, nuts, milk and egg intakes and lower daily vegetable intake in subjects within Q4 quartile of serum  $\alpha$ -TOH/retinol ratio. Interactions of VE and VA absorption and tissue accumulation have been reported [22,23], and high dietary levels of vitamin A have been found to depress vitamin E utilization in animals studied [24]. A decline of serum and liver  $\alpha$ -TOH was observed in high VA diet fed weaned pigs [25]. These results suggest potential adverse interactions of VA and VE, and an optimal interactive

state between VE and VA might be essential to maintain their normal physiological functions *in vivo* [26].

In agreement with other previously published studies [27], increased serum lipids (LDL-C and TG) are observed in ApoE4 subjects. Correspondingly, higher serum  $\alpha$ -TOH was also found in ApoE2 and E4 carriers. However, after adjusting  $\alpha$ -TOH status with lipid, ApoE genotype difference of VE ceased to establish. These outcomes are consistent with recent results emphasizing that increase in serum TG and LDL-C levels in ApoE2 and ApoE4 subjects might contribute to these genotype-dependent differences observed in serum VE levels [28].

Gómez-Coronado and colleagues found that ApoE polymorphism imposed an independent impact on serum VA levels; and the authors concluded that the potential effect of ApoE2 on VA could not be explained by the increased serum TG levels in ApoE2 subjects [29]. In the current study, we observed an increased serum TG levels and decreased retinol in ApoE2 and E4 subjects. Even after adjusting retinol status with lipids, ApoE genotype difference in retinol status was still significant. These results might be explained by the observed weaker correlation of serum vitamin A with lipids [30]. Poor cognitive performance was found in both ApoE2 and E4 carriers, demonstrated by lower naming ability, orientation ability and total MoCA score. ApoE4-dependent neurological disorder has been extensively reported [31]. The relationship between ApoE2 and neuro-pathologic features of AD has been quite controversial and complex. ApoE2 has suggestively possessed a protective property against cognitive decline [32]. Yet, other investigators have not found any links between ApoE2 and MCI [33]. Therefore, the association between ApoE2 and cognitive function yet remains to be fully clarified.

Direct effect of ApoE on  $\alpha$ -TOH dynamics in the brain was strongly suggested by previous studies [34,35]. In the current study, we detected significantly higher serum TC,  $\alpha$ -TOH and  $\alpha$ -TOH/retinol ratio in ApoE4-MCI subjects. Also, lower daily vegetable, fish and egg intakes and moderate amount of whole grains intake were found in MCI-ApoE4 subjects, which partially indicates the interactive impacts of genetic predisposition (ApoE genotype) and environmental factors (dietary patterns) on lipid profile and cognitive function phenotypes in the elderly. The combined effect of ApoE genotypes and  $\alpha$ -TOH/retinol ratio for the risk of developing MCI is also ascertained by the logistic analysis results. In subjects with ApoE2 or E4 genotype, a higher serum  $\alpha$ -TOH/retinol ratio predicted an increased risk of developing MCI in the elderly. The

outcome of this current study interestingly implicates that the “good” or “bad” roles of ApoE2 or E4 in affecting cognition may depend on both circulating lipids and vitamins (VE and VA) nutritional states.

Conclusively, our findings demonstrate that serum VA and VE states are determined by diet and circulating lipid concentration. The relationship between circulating VE with cognitive performance is also modifiable by lipid status. Lower circulating retinol and higher  $\alpha$ -TOH/retinol ratio potentially predict an increased risk for the development of cognitive decline in aging Chinese adults. ApoE2 and E4 carriers with higher circulating  $\alpha$ -TOH/retinol states infer poor cognitive performance and an increased risk of developing MCI.

## MATERIALS AND METHODS

### Participants

A total of 1800 Chinese community residents aged 55-80 were randomly recruited from Nanyuan and Wulituo Communities (Beijing, China). Exclusion criteria of the participants were: severe diseases or conditions known to affect cognitive function (e.g., inflammatory diseases, recent history of heart or respiratory failure, chronic liver disease or renal failure, malignant tumors, a recent history of alcohol abuse, history of cerebral apoplexy or cerebral infarction). As per our previously published documents [36], the subjects with AD, Parkinson's disease (PD), long-term frequency intake of antidepressants and medication acting on central nervous system, or those unable to finish the cognition tests were also excluded from the study. The Medical Ethics Committee of Capital Medical University (No. 2012SY23) approved the study and written informed consents were obtained from all participants.

### Anthropometric measurements and socio-demographic variables

Anthropometric parameters (height and weight) were measured by registered nurses from the community's health service center. Body mass indices (BMI) were calculated as weight (kg)/height (m)<sup>2</sup>. Information on demographic characteristics (e.g., age, gender, nationality, and education), lifestyle factors [e.g., living condition (living alone, yes or no), smoking (yes or no), alcohol drinking (yes or no), physical activity (never, 1-3 times/week, 4-5 times/week, everyday), reading habit (yes or no), and housekeeping (yes or no)], AD family history (yes or no), medical history of chronic diseases and the usage of dietary supplements (yes or no) were collected by self-administered questionnaires adopted from our previous studies [37]. Educational level was

assessed as the highest level attained and classified into six categories (illiterate, primary school, junior high school, high school, junior college, undergraduate and above).

### **Cognitive tests**

Global cognitive function was assessed with the Montreal Cognitive Assessment (MoCA) by well-trained medical doctors from the community health service center. According to a previous study conducted in elderly Chinese population, the cut-off points used for MCI diagnosis were as follows: 13/14 for individuals with no formal education, 19/20 for individuals with 1 to 6 years of education, and 24/25 for individuals with 7 or more years of education. The cut-offs above were shown to be sensitive and efficient in the diagnosis of MCI in elderly Chinese population [38].

### **Dietary survey**

Dietary assessment was carried out according to the description of our previous study [39]. Briefly, the habitual consumption of 11 food groups (fruits, vegetables, whole grains, legume, red meats, poultry, fish, eggs, nuts, cooking oil, milk, comprising 35 items in total) was surveyed by using a validated semi-quantitative food frequency questionnaire (FFQ). The questionnaire was adopted from a questionnaire used for the dietary investigation of Chinese residents [40].

### **Blood measurement**

#### ***Measurement of plasma parameters***

Fasting venous blood samples were obtained from participants. Blood samples were centrifuged in lithium heparin tubes at 480 g for 10 minutes at 4°C, and then stored at -80°C before further analyses. Plasma glucose (GLU), triglyceride (TG) and total cholesterol (TC) were measured by an ILAB8600 clinical chemistry analyzer (Instrumentation Laboratory Lexington, WI, USA). A commercially available assay from Instrumentation Laboratory (Lexington, WI, USA) was used to determine high density lipoprotein cholesterol (HDL-C). And Low-density lipoprotein cholesterol (LDL-C) was calculated using the Friedewald formula [41]. All samples of each subject were analyzed within a single batch, and the inter-assay coefficients of variation (CV) for all determinations were less than 5%.

#### ***Measurement of serum retinol and vitamin E***

Serum retinol and vitamin E ( $\alpha$ -TOH and  $\gamma$ -TOH) concentrations were measured by reverse phase high-

performance liquid chromatography (Waters Chromatograph) simultaneously as previously described [42].

### ***DNA isolation and genotyping***

Peripheral blood samples (6 ml intravenously) were collected in vacuum tubes and stored at -80°C. DNA was extracted from frozen peripheral blood using the Wizare genomic DNA purification kit (Promega, Madison, WI, USA). ApoE genotypes were determined by Polymerase Chain Reaction (PCR) amplification and Restricted Fragment Length Polymorphism (RFLP) analysis according to the method described by Hixson [43]. For ApoE genotype, subjects with the E2/E2 and E2/E3 genotypes were grouped as E2 carrier; subjects with E3/E3 were classified as E3 homozygote; and subjects with E3/E4 or E4/E4 were grouped as E4 carrier.

### **Statistical analyses**

Data was analyzed with the software SPSS 19.0 (Chicago, IL, USA). Continuous variables were presented as means  $\pm$  standard deviation (SD) or mean (95% confidence interval, CI). Gender, smoking, alcohol drinking, physical activity, education, AD family history, reading and housekeeping were presented as categorical variables. Participants were classified according to categories of ApoE genotypes and the quartile of serum VE and VA levels. General linear model (GLM) was used to compare the means of the detected parameters and food intake between the groups. The following putative confounding factors were included in the analyses when comparing serum parameters: age, gender, BMI, physical activity, smoking, alcohol drinking, and usage of antioxidant supplement, diabetes and hyperlipidemia. During comparison of daily food intakes, confounding factors including gender, age, BMI, smoking habit, physical activity and alcohol drinking were adjusted. For cognition analysis, factors including gender, age, BMI, education, living condition, AD family history, physical activity, reading and smoking habit, and housekeeping were adjusted. Chi-square test was used for the comparison of binary categorical variables difference among groups. Partial correlation analysis was used to explore the relationship between serum vitamin status with lipids and cognition. Logistic regression model was run to evaluate the risk of cognitive impairment. We adjusted for demographic variables including age, gender, education, smoking, alcohol drinking, diabetes mellitus and hyperlipidemia in the model. Statistical significance was set at  $P < 0.05$ .

## ACKNOWLEDGMENTS

The authors thank all study participants for their participation.

## CONFLICTS OF INTEREST

The authors declare no conflicts of interest.

## FUNDING

This study is supported by grants from National Natural Science Foundation of China (No. 81673148), and National Key Research and Development Program of China (No. 2016YFC0900603).

## REFERENCES

1. Craft NE, Haitema TB, Garnett KM, Fitch KA, Dorey CK. Carotenoid, tocopherol, and retinol concentrations in elderly human brain. *J Nutr Health Aging*. 2004; 8:156–62.
2. Smith MA, Petot GJ, Perry G. Diet and oxidative stress: a novel synthesis of epidemiological data on Alzheimer's disease. *J Alzheimers Dis*. 1999; 1:203–06. <https://doi.org/10.3233/JAD-1999-14-502>
3. Bhatti AB, Usman M, Ali F, Satti SA. Vitamin supplementation as an adjuvant treatment for Alzheimer's Disease. *J Clin Diagn Res*. 2016; 10:OE07–11. <https://doi.org/10.7860/JCDR/2016/20273.8261>
4. Usoro OB, Mousa SA. Vitamin E forms in Alzheimer's disease: a review of controversial and clinical experiences. *Crit Rev Food Sci Nutr*. 2010; 50:414–19. <https://doi.org/10.1080/10408390802304222>
5. Döring F, Rimbach G, Lodge JK. In silico search for single nucleotide polymorphisms in genes important in vitamin E homeostasis. *IUBMB Life*. 2004; 56:615–20. <https://doi.org/10.1080/15216540400020346>
6. Corder EH, Saunders AM, Strittmatter WJ, Schmechel DE, Gaskell PC, Small GW, Roses AD, Haines JL, Pericak-Vance MA. Gene dose of apolipoprotein E type 4 allele and the risk of Alzheimer's disease in late onset families. *Science*. 1993; 261:921–23. <https://doi.org/10.1126/science.8346443>
7. Farrer LA, Cupples LA, Haines JL, Hyman B, Kukull WA, Mayeux R, Myers RH, Pericak-Vance MA, Risch N, van Duijn CM, and APOE and Alzheimer Disease Meta Analysis Consortium. Effects of age, sex, and ethnicity on the association between apolipoprotein E genotype and Alzheimer disease. A meta-analysis. *JAMA*. 1997; 278:1349–56. <https://doi.org/10.1001/jama.1997.03550160069041>
8. Law MR, Wald NJ, Thompson SG. By how much and how quickly does reduction in serum cholesterol concentration lower risk of ischaemic heart disease? *BMJ*. 1994; 308:367–72. <https://doi.org/10.1136/bmj.308.6925.367>
9. Hooper PL, Hooper EM, Hunt WC, Garry PJ, Goodwin JS. Vitamins, lipids and lipoproteins in a healthy elderly population. *Int J Vitam Nutr Res*. 1983; 53:412–19.
10. Huebbe P, Jofre-Monseny L, Rimbach G. Alpha-tocopherol transport in the lung is affected by the apoE genotype--studies in transgenic apoE3 and apoE4 mice. *IUBMB Life*. 2009; 61:453–56. <https://doi.org/10.1002/iub.177>
11. Gómez-Coronado D, Entrala A, Alvarez JJ, Ortega H, Olmos JM, Castro M, Sastre A, Herrera E, Lasunción MA. Influence of apolipoprotein E polymorphism on plasma vitamin A and vitamin E levels. *Eur J Clin Invest*. 2002; 32:251–58. <https://doi.org/10.1046/j.1365-2362.2002.00983.x>
12. Shahar S, Lee LK, Rajab N, Lim CL, Harun NA, Noh MF, Mian-Then S, Jamal R. Association between vitamin A, vitamin E and apolipoprotein E status with mild cognitive impairment among elderly people in low-cost residential areas. *Nutr Neurosci*. 2013; 16:6–12. <https://doi.org/10.1179/1476830512Y.0000000013>
13. Weisgraber KH, Rall SC Jr, Mahley RW. Human E apoprotein heterogeneity. Cysteine-arginine interchanges in the amino acid sequence of the apo-E isoforms. *J Biol Chem*. 1981; 256:9077–83.
14. Engelhart MJ, Ruitenberg A, Meijer J, Kiliaan A, van Swieten JC, Hofman A, Witteman JC, Breteler MM. Plasma levels of antioxidants are not associated with Alzheimer's disease or cognitive decline. *Dement Geriatr Cogn Disord*. 2005; 19:134–39. <https://doi.org/10.1159/000082884>
15. Bourdel-Marchasson I, Delmas-Beauvieux MC, Peuchant E, Richard-Harston S, Decamps A, Reigner B, Emeriau JP, Rainfray M. Antioxidant defences and oxidative stress markers in erythrocytes and plasma from normally nourished elderly Alzheimer patients. *Age Ageing*. 2001; 30:235–41. <https://doi.org/10.1093/ageing/30.3.235>
16. Zielińska MA, Białecka A, Pietruszka B, Hamułka J. Vegetables and fruit, as a source of bioactive substances, and impact on memory and cognitive

- function of elderly. *Postepy Hig Med Dosw (Online)*. 2017; 71:267–80.  
<https://doi.org/10.5604/01.3001.0010.3812>
17. El Euch-Fayache G, Bouhlal Y, Amouri R, Feki M, Hentati F. Molecular, clinical and peripheral neuropathy study of Tunisian patients with ataxia with vitamin E deficiency. *Brain*. 2014; 137:402–10.  
<https://doi.org/10.1093/brain/awt339>
  18. Zaman Z, Roche S, Fielden P, Frost PG, Niriella DC, Cayley AC. Plasma concentrations of vitamins A and E and carotenoids in Alzheimer's disease. *Age Ageing*. 1992; 21:91–94.  
<https://doi.org/10.1093/ageing/21.2.91>
  19. Squali Houssaini FZ, Foulon T, Payen N, Iraqi MR, Arnaud J, Gros Lambert P. Plasma fatty acid status in Moroccan children: increased lipid peroxidation and impaired polyunsaturated fatty acid metabolism in protein-calorie malnutrition. *Biomed Pharmacother*. 2001; 55:155–62. [https://doi.org/10.1016/S0753-3322\(01\)00041-5](https://doi.org/10.1016/S0753-3322(01)00041-5)
  20. Isaac MG, Quinn R, Tabet N. Vitamin E for Alzheimer's disease and mild cognitive impairment. *Cochrane Database Syst Rev*. 2008; 16:CD002854.
  21. Mangialasche F, Kivipelto M, Mecocci P, Rizzuto D, Palmer K, Winblad B, Fratiglioni L. High plasma levels of vitamin E forms and reduced Alzheimer's disease risk in advanced age. *J Alzheimers Dis*. 2010; 20:1029–37. <https://doi.org/10.3233/JAD-2010-091450>
  22. Drott P, Ewald U, Meurling S. Plasma levels of fat-soluble vitamins A and E in neonates, after administration of two different vitamin solutions. *Clin Nutr*. 1993; 12:96–102.  
[https://doi.org/10.1016/0261-5614\(93\)90058-C](https://doi.org/10.1016/0261-5614(93)90058-C)
  23. Olivares A, Rey AI, Daza A, Lopez-Bote CJ. High dietary vitamin A interferes with tissue  $\alpha$ -tocopherol concentrations in fattening pigs: a study that examines administration and withdrawal times. *Animal*. 2009; 3:1264–70.  
<https://doi.org/10.1017/S175173110900487X>
  24. Grobas S, Méndez J, Lopez BC, De BC, Mateos GG. Effect of vitamin E and A supplementation on egg yolk alpha-tocopherol concentration. *Poult Sci*. 2002; 81:376–81. <https://doi.org/10.1093/ps/81.3.376>
  25. Ching S, Mahan DC, Wiseman TG, Fastinger ND. Evaluating the antioxidant status of weanling pigs fed dietary vitamins A and E. *J Anim Sci*. 2002; 80:2396–401.
  26. Schelling GT, Roeder RA, Garber MJ, Pumfrey WM. Bioavailability and interaction of vitamin A and vitamin E in ruminants. *J Nutr*. 1995 (Suppl ); 125:1799S–803S.
  27. Davignon J, Gregg RE, Sing CF. Apolipoprotein E polymorphism and atherosclerosis. *Arteriosclerosis*. 1988; 8:1–21. <https://doi.org/10.1161/01.ATV.8.1.1>
  28. Mas E, Dupuy AM, Artero S, Portet F, Cristol JP, Ritchie K, Touchon J. Functional Vitamin E deficiency in ApoE4 patients with Alzheimer's disease. *Dement Geriatr Cogn Disord*. 2006; 21:198–204.  
<https://doi.org/10.1159/000090868>
  29. Gómez-Coronado D, Entrala A, Alvarez JJ, Ortega H, Olmos JM, Castro M, Sastre A, Herrera E, Lasunción MA. Influence of apolipoprotein E polymorphism on plasma vitamin A and vitamin E levels. *Eur J Clin Invest*. 2002; 32:251–58.  
<https://doi.org/10.1046/j.1365-2362.2002.00983.x>
  30. Vogel S, Contois JH, Tucker KL, Wilson PW, Schaefer EJ, Lammi-Keefe CJ. Plasma retinol and plasma and lipoprotein tocopherol and carotenoid concentrations in healthy elderly participants of the Framingham Heart Study. *Am J Clin Nutr*. 1997; 66:950–58. <https://doi.org/10.1093/ajcn/66.4.950>
  31. Smith JD. Apolipoprotein E4: an allele associated with many diseases. *Ann Med*. 2000; 32:118–27. <https://doi.org/10.3109/07853890009011761>
  32. Corder EH, Saunders AM, Risch NJ, Strittmatter WJ, Schmechel DE, Gaskell PC Jr, Rimmler JB, Locke PA, Conneally PM, Schmechel KE, Small GW, Roses AD, Haines JL, Pericak-Vance MA. Protective effect of apolipoprotein E type 2 allele for late onset Alzheimer disease. *Nat Genet*. 1994; 7:180–84. <https://doi.org/10.1038/ng0694-180>
  33. Chen KL, Sun YM, Zhou Y, Zhao QH, Ding D, Guo QH. Associations between APOE polymorphisms and seven diseases with cognitive impairment including Alzheimer's disease, frontotemporal dementia, and dementia with Lewy bodies in southeast China. *Psychiatr Genet*. 2016; 26:124–31.  
<https://doi.org/10.1097/YPG.000000000000126>
  34. Vatassery GT, Lam C, Smith WE, Quach HT. Apolipoprotein E exerts selective and differential control over vitamin E concentrations in different areas of mammalian brain. *J Neurosci Res*. 2006; 84:1335–42. <https://doi.org/10.1002/jnr.21037>
  35. Vatassery GT, Quach HT, Smith WE, Santacruz KS, Roy S. Apolipoprotein e deficiency leads to altered brain uptake of alpha tocopherol injected into lateral cerebral ventricles. *Biochim Biophys Acta*. 2007; 1772:797–803.  
<https://doi.org/10.1016/j.bbadis.2007.04.006>

36. Cai C, Xiao R, Van Halm-Lutterodt N, Zhen J, Huang X, Xu Y, Chen S, Yuan L. Association of MTHFR, SLC19A1 genetic polymorphism, serum folate, vitamin B(12) and Hcy status with cognitive functions in Chinese adults. *Nutrients*. 2016; 8:E665. <https://doi.org/10.3390/nu8100665>
37. Dong L, Xiao R, Cai C, Xu Z, Wang S, Pan L, Yuan L. Diet, lifestyle and cognitive function in old Chinese adults. *Arch Gerontol Geriatr*. 2016; 63:36–42. <https://doi.org/10.1016/j.archger.2015.12.003>
38. Lu J, Li D, Li F, Zhou A, Wang F, Zuo X, Jia XF, Song H, Jia J. Montreal cognitive assessment in detecting cognitive impairment in Chinese elderly individuals: a population-based study. *J Geriatr Psychiatry Neurol*. 2011; 24:184–90. <https://doi.org/10.1177/0891988711422528>
39. Zhen J, Lin T, Huang X, Zhang H, Dong S, Wu Y, Song L, Xiao R, Yuan L. Association of ApoE polymorphism and Type 2 diabetes with cognition in non-demented aging Chinese adults: a community based cross-sectional study. *Aging Dis*. 2018; 9:346–57. <https://doi.org/10.14336/AD.2017.0715>
40. Zhang W, Li Q, Shi L, Lu K, Shang Q, Yao L, Ye G. [Investigation of dietary intake of cadmium in certain polluted area of south in China]. *Wei Sheng Yan Jiu*. 2009; 38:552–54, 557.
41. Friedewald WT, Levy RI, Fredrickson DS. Estimation of the concentration of low-density lipoprotein cholesterol in plasma, without use of the preparative ultracentrifuge. *Clin Chem*. 1972; 18:499–502.
42. Cuesta Sanz D, Castro Santa-Cruz M. Simultaneous measurement of retinol and alpha-tocopherol in human serum by high-performance liquid chromatography with ultraviolet detection. *J Chromatogr A*. 1986; 380:140–44. [https://doi.org/10.1016/S0378-4347\(00\)83634-8](https://doi.org/10.1016/S0378-4347(00)83634-8)
43. Hixson JE, Vernier DT. Restriction isotyping of human apolipoprotein E by gene amplification and cleavage with HhaI. *J Lipid Res*. 1990; 31:545–48.

**SUPPLEMENTARY MATERIAL**

**Supplementary Table S1. Partial correlation coefficients between serum lipids and VE and retinol status (n = 1754).**

| Parameters | Retinol  | $\alpha$ -TOH | $\gamma$ -TOH | $\alpha$ -TOH/retinol | $\gamma$ -TOH/retinol |
|------------|----------|---------------|---------------|-----------------------|-----------------------|
| GLU        | -0.034   | 0.118**       | 0.099**       | 0.083**               | 0.075**               |
| TC         | 0.020    | 0.503**       | 0.275**       | 0.296**               | 0.173**               |
| TG         | 0.109**  | 0.535**       | 0.422**       | 0.240**               | 0.226**               |
| HDL-C      | -0.189** | 0.149**       | 0.019         | 0.228**               | 0.117**               |
| LDL-C      | 0.273**  | 0.241**       | 0.158**       | -0.036                | -0.049*               |

Partial correlation analysis was used to explore the relationship between serum  $\alpha$ -TOH and retinol status with serum GLU and lipids status. Factors including age, gender, BMI, smoking, alcohol and physical activity were adjusted during data analysis. TG: triglyceride; TC: total cholesterol. GLU: glucose; TC: total cholesterol; TG: triglyceride; LDL-C: low density lipoprotein cholesterol; HDL-C: high density lipoprotein cholesterol;  $\alpha$ -TOH:  $\alpha$ -tocopherol;  $\gamma$ -TOH:  $\gamma$ -tocopherol. \*:  $P < 0.05$ ; \*\*:  $P < 0.01$ .
