# Supplementary material for: Diminished circulating retinol and elevated α-TOH/retinol ratio predict an increased risk of cognitive decline in aging Chinese adults, especially in subjects with ApoE2 or ApoE4 genotype
Source: publisher site journal article supplement (doi:10.18632/aging.101694), 2018-12-20
Supplement: Supplementary file [file aging-v10i12-101694-supplementary-material-SD1.pdf]

**Supplementary Table S1. Partial correlation coefficients between serum lipids and VE and retinol status (n = 1754).**

| Parameters | Retinol  | $\alpha$ -TOH | $\gamma$ -TOH | $\alpha$ -TOH/retinol | $\gamma$ -TOH/retinol |
|------------|----------|---------------|---------------|-----------------------|-----------------------|
| GLU        | -0.034   | 0.118**       | 0.099**       | 0.083**               | 0.075**               |
| TC         | 0.020    | 0.503**       | 0.275**       | 0.296**               | 0.173**               |
| TG         | 0.109**  | 0.535**       | 0.422**       | 0.240**               | 0.226**               |
| HDL-C      | -0.189** | 0.149**       | 0.019         | 0.228**               | 0.117**               |
| LDL-C      | 0.273**  | 0.241**       | 0.158**       | -0.036                | -0.049*               |

Partial correlation analysis was used to explore the relationship between serum  $\alpha$ -TOH and retinol status with serum GLU and lipids status. Factors including age, gender, BMI, smoking, alcohol and physical activity were adjusted during data analysis. TG: triglyceride; TC: total cholesterol. GLU: glucose; TC: total cholesterol; TG: triglyceride; LDL-C: low density lipoprotein cholesterol; HDL-C: high density lipoprotein cholesterol;  $\alpha$ -TOH:  $\alpha$ -tocopherol;  $\gamma$ -TOH:  $\gamma$ -tocopherol. \*:  $P < 0.05$ ; \*\*:  $P < 0.01$ .
